1 **Elucidating Mechanisms of Antitumor Immunity Mediated by Live Oncolytic Vaccinia and**  
2 **Heat-Inactivated Vaccinia**

Weiyi Wang<sup>1#</sup>, Peihong Dai<sup>1#</sup>, Shuaitong Liu<sup>1#</sup>, Ning Yang<sup>1</sup>, Yi Wang<sup>1</sup>, Rachel A. Giese<sup>2</sup>, Taha Merghoub<sup>2,3,4,5</sup>, Jedd D. Wolchok<sup>2,3,4,5</sup>, and Liang Deng<sup>1,3,4\*</sup>

<sup>1</sup>Dermatology Service, Department of Medicine, Memorial Sloan Kettering Cancer Center, New York, NY, USA

<sup>2</sup>Immuno-oncology service, Human Oncology and Pathogenesis Program; Memorial Sloan Kettering Cancer Center, New York, NY 10065, USA

<sup>3</sup>Parker Institute for Cancer Immunotherapy, Memorial Sloan Kettering Cancer Center, New York, NY, USA

<sup>4</sup>Weill Cornell Medical College, New York, NY, USA

<sup>5</sup>Swim Across America and Ludwig Collaborative Laboratory, Immunology Program, Memorial Sloan Kettering Cancer Center, New York, NY USA

\*corresponding author. Mailing address for Liang Deng: Dermatology Service, Department of Medicine, Memorial Sloan Kettering Cancer Center, 1275 York Ave., New York, NY 10065.

Email: [dengl@mskcc.org](mailto:dengl@mskcc.org). # These three authors contributed equally to this work.

3 **Abstract:**

4 **Background:** Viral-based immunotherapy has the potential to overcome resistance to immune  
5 checkpoint blockade (ICB) and to fill the unmet needs of many cancer patients. Oncolytic  
6 viruses (OVs) are defined as engineered or naturally occurring viruses that selectively replicate  
7 in and kill cancer cells. OVs also induce antitumor immunity. The purpose of this study is to  
8 compare the antitumor effects of live OV-GM expressing murine granulocyte-macrophage  
9 colony-stimulating factor (mGM-CSF) versus inactivated OV-GM and elucidate the underlying  
10 immunological mechanisms.

11 **Methods:** In this study, we engineered a replication-competent, oncolytic vaccinia virus (OV-  
12 GM) by inserting a murine GM-CSF gene into the thymidine kinase (TK) locus of a mutant  
13 vaccinia E3LΔ83N, which lacks the Z-DNA-binding domain of vaccinia virulence factor E3. We  
14 compared the antitumor effects of intratumoral (IT) delivery of live OV-GM vs. heat-inactivated  
15 OV-GM (heat-iOV-GM) in a murine B16-F10 melanoma bilateral implantation model.

16 **Results:** Heat-iOV-GM infection of dendritic cells (DCs) and tumor cells in vitro induces type I  
17 IFN and pro inflammatory cytokines and chemokines, whereas live OV-GM does not. IT live  
18 OV-GM is less effective in generating systemic antitumor immunity compared with heat-iOV-  
19 GM. Similar to heat-iOV-GM, the antitumor effects of live OV-GM also require Batf3-  
20 dependent CD103<sup>+</sup> dendritic cells. IT heat-iOV-GM induces higher numbers of infiltrating  
21 activated CD8<sup>+</sup> and CD4<sup>+</sup> T cells as well as higher levels of type I IFN, proinflammatory  
22 cytokines, and chemokines in the distant non-injected tumors, which is dependent on CD8<sup>+</sup> T  
23 cells. When combined with systemic delivery of ICB, IT heat-iOV-GM is more effective in  
24 eradicating tumors compared with live OV-GM.

25 **Conclusions:** Tumor lysis induced by the replication of oncolytic DNA viruses has a limited  
26 effect on the generation of systemic antitumor immunity. The activation of Batf3-dependent  
27 CD103<sup>+</sup> DCs is critical for antitumor effects induced by both live OV-GM and heat-iOV-GM.  
28 Heat-iOV-GM is more potent than live OV-GM in the induction of innate and adaptive immunity  
29 in both the injected and distant non-injected tumors. We propose that evaluations of both innate  
30 and adaptive immunity induced by IT oncolytic viral immunotherapy at injected and non-  
31 injected tumors should be included as potential biomarkers.

32

## 33 **Keywords**

34 Oncolytic virus, vaccinia virus, modified vaccinia virus Ankara, heat-inactivated vaccinia virus,  
35 CD103<sup>+</sup> dendritic cells, the cytosolic DNA-sensing pathway, type I interferon, innate immunity

36

## 37 **Background**

38 Oncolytic viral therapy has the potential to overcome resistance to immune checkpoint blockade  
39 (ICB), an immunotherapy increasingly being used in patients with advanced cancers<sup>1-3</sup>. In 2015,  
40 the U.S. Food and Drug Administration approved the first oncolytic virus for the treatment of  
41 advanced melanoma: Talimogene Laherparepvec (T-VEC) is an engineered herpes simplex  
42 virus-1 that allows tumor-selective replication and expresses human granulocyte-macrophage  
43 colony-stimulating factor (GM-CSF)<sup>4-6</sup>. Clinical trials on the combination of intratumoral (IT)  
44 injection of T-VEC with systemic delivery of ICB agents-- including ipilimumab and  
45 pembrolizumab, which blocks the cytotoxic T cell-associated antigen 4 (CTLA-4) and  
46 programmed death protein 1 (PD-1), respectively -- have shown enhanced therapeutic efficacy  
47 and increased cytotoxic T cell infiltration into tumors<sup>7-9</sup>.

48 Poxviruses are large cytoplasmic DNA viruses<sup>10</sup>. Preclinical studies and clinical trials have  
49 demonstrated the efficacy of using oncolytic vaccinia viruses for the treatment of advanced  
50 cancers<sup>11-15</sup>. For example, JX594, also known as Pexastimogene Devacirepvec (Pexa Vec),  
51 an oncolytic vaccinia virus featuring the deletion of the thymidine kinase (TK) gene to enhance  
52 tumor selectivity and the expression of human GM-CSF, has demonstrated therapeutic efficacy  
53 in a Phase II clinical trial for patients with advanced hepatocellular carcinoma (Heo et al., 2012).  
54 Unfortunately, phase III clinical trial (NCT02562755) comparing Pexa Vec followed by  
55 sorafenib vs. sorafenib alone discontinued enrollment after an interim futility analysis showing  
56 lack of efficacy.

57 While the tumor killing effects of oncolytic viruses have traditionally been attributed to their  
58 selective replication within tumor cells, the ability of oncolytic virotherapy to elicit host  
59 antitumor immunity plays a crucial role as well<sup>16-20</sup>. However, the mechanisms by which  
60 oncolytic virotherapy induces antitumor immunity remain largely unknown. Modified vaccinia  
61 virus Ankara (MVA), a highly attenuated vaccinia strain, is an important vaccine vector against

62 various infectious agents<sup>21-26</sup>. We previously reported that MVA infection of conventional  
63 dendritic cells (cDCs) triggers type I IFN via the cGAS/STING-mediated cytosolic DNA-sensing  
64 pathway<sup>27</sup>. The cGAS/STING and type I IFN pathways are innate sensing mechanisms critical  
65 for antiviral and antitumor immunity<sup>28-38</sup>. Infection of cDCs with heat-inactivated MVA (heat-  
66 iMVA) generated by heating the virus at 55°C for 1 h leads to higher levels of type I IFN than  
67 with MVA. Intratumoral (IT) delivery of heat-iMVA leads to tumor eradication as well as the  
68 development of systemic antitumor immunity, which requires CD8<sup>+</sup> T cells, Batf3-dependent  
69 CD103<sup>+</sup> DCs, as well as the STING-mediated cytosolic DNA-sensing pathway<sup>39</sup>. Our results  
70 demonstrate that IT heat-iMVA alters the immunosuppressive tumor microenvironment (TME)  
71 by inducing the production of IFN, proinflammatory cytokines, and chemokines both in tumor  
72 cells and immune cells via STING, and by activating tumor-infiltrating CD103<sup>+</sup> DCs that  
73 contribute to the priming, expansion and recruitment of activated antitumor CD4<sup>+</sup> and CD8<sup>+</sup> T  
74 cells and tumor eradication<sup>39</sup>.

75 In this study, we engineered a replication-competent, oncolytic vaccinia virus (OV-GM) by  
76 inserting murine GM-CSF gene into the thymidine kinase (TK) locus of a mutant vaccinia  
77 E3LΔ83N (Western Reserve strain), which lacks the Z-DNA-binding domain of vaccinia  
78 virulence factor E3. E3LΔ83N replicates efficiently in many cell lines, but is highly attenuated,  
79 with reduced virulence of about 1,000-fold compared with wild type vaccinia in *in vivo* infection  
80 models<sup>40</sup>. We compared the antitumor effects of IT delivery of live OV vs. live OV-GM vs. heat-  
81 inactivated OV-GM (heat-iOV-GM) in bilateral and unilateral murine tumor models in immune-  
82 competent syngeneic mice. Expression of murine GM-CSF by live OV-GM slightly improved  
83 the generation of effector CD8<sup>+</sup> and CD4<sup>+</sup> T cells in both the injected and non-injected tumors.  
84 Although heat-iOV-GM does not express murine GM-CSF, we compared the antitumor effects  
85 of heat-iOV-GM with live OV-GM because many oncolytic viral platforms express GM-CSF as  
86 a transgene including JX594/Pexa Vec, a clinical oncolytic vaccinia candidate. We found that IT  
87 heat-iOV-GM is more effective in eradicating tumors and generating systemic antitumor  
88 immunity than live OV-GM in both unilateral and bilateral tumor implantation models. The  
89 antitumor effects of both live OV-GM and heat-iOV-GM require Batf3-dependent  
90 CD103<sup>+</sup>/CD8α<sup>+</sup> DCs, which are efficient in cross-presenting tumor antigens. Our results provide  
91 strong evidence that viral replication and viral-mediated oncolysis are not required for the  
92 generation of antitumor effects by vaccinia virus. Rather, the activation of the host's immune

93 system -- including the Batf3-dependent CD103<sup>+</sup> DCs, likely via the cGAS/STING-mediated  
94 cytosolic DNA-sensing pathway -- is crucial for the therapeutic efficacy of vaccinia-based  
95 immunotherapy. Our findings have important clinical implications for the future design of  
96 optimal vaccinia-based cancer immunotherapeutics.

97

## 98 **Methods**

### 99 **Study design**

100 In this study, we used unilateral and bilateral tumor implantation models to compare the anti-  
101 tumor activities of live or heat-inactivated recombinant vaccinia virus expressing murine GM-  
102 CSF. We also determined the relative contributions of the cytosolic DNA-sensing pathway and  
103 CD103<sup>+</sup> DCs in the induced antitumor effects using STING<sup>Gt/Gt</sup> and Batf3<sup>-/-</sup> mice. In all  
104 experiments, animals were assigned to various experimental groups at random. For survival  
105 studies, sample sizes of 8-10 mice were used and the experiments were performed two or three  
106 times. For experiments designed to evaluate the tumor immune cell infiltrates, 3-5 mice were  
107 used for each experiment and the experiments were performed two or three times. For the  
108 experiments designed to assess the induction of type I IFN and proinflammatory cytokines and  
109 chemokines in tumors, 3-5 mice were used for collecting the tumors and triplicate quantitative  
110 real-time PCR analyses were performed for each tumor sample, and the experiments were  
111 performed two or three times.

112

### 113 **Viruses and Cell lines**

114 E3LΔ83N virus was kindly provided by Bertram Jacobs (Arizona State University). E3LΔ83N  
115 (OV-TK<sup>+</sup>), OV, or OV-GM viruses were propagated in BSC-40 (Africa green monkey kidney  
116 cells, ATCC-CRL2761) cells. Viruses were purified through a 36% sucrose cushion. Heat-iOV-  
117 GM virus was generated by incubating purified OV-GM virus at 55°C for 1 hour. BSC-40 cells  
118 were maintained in DMEM medium containing 5% FBS, penicillin and streptomycin. The  
119 murine melanoma B16-F10 cell line was originally obtained from I. Fidler (MD Anderson  
120 Cancer Center) and was maintained in RPMI 1640 medium supplemented with 10% FBS,  
121 penicillin and streptomycin.

122

### 123 **Mice**

124 Female C57BL/6J mice were purchased from the Jackson Laboratory (Stock # 000664). *Batf3*<sup>-/-</sup>  
125 mice were from Dr. Kenneth Murphy (Washington University). *STING*<sup>Gt/Gt</sup> mice were a kind gift  
126 from Dr. Russell Vance (University of California, Berkeley). These mice were maintained in the  
127 animal facility at the Sloan Kettering Institute. All procedures were performed in strict  
128 accordance with the recommendations in the Guide for the Care and Use of Laboratory Animals  
129 of the National Institute of Health. The animal protocol was approved by the Institutional Animal  
130 Care and Use Committee at Sloan Kettering Institute.

131

### 132 **Generating recombinant vaccinia virus expressing mGM-CSF**

133 Murine GM-CSF (mGM-CSF) coding sequence was inserted into the pCB vector between Xba I  
134 and EcoR I sites. Vaccinia synthetic early and late promoter (PsE/L) was used to express mGM-  
135 CSF, and the vaccinia P7.5 promoter was used to express the drug selection gene, the *E. coli*  
136 xanthine-guanine phosphoribosyl transferase gene (*gpt*). These two expression cassettes were  
137 flanked by a partial sequence of the TK gene on each side. To generate recombinant viruses OV  
138 (E3LΔ83N-TK<sup>-</sup>) or OV-GM (E3LΔ83N-TK<sup>-</sup>-mGM-CSF), BSC40 cells were seeded into a 6-well  
139 plate and were then infected with E3LΔ83N at the multiplicity of infection (MOI) of 0.05. Two  
140 hours after virus infection, transfection mixtures containing plasmid DNA and Lipofectamine  
141 3000 (Invitrogen) were added to the well, and the cells were incubated at 37°C for 48 hours. The  
142 recombinant viruses were enriched in the *gpt* selection medium which contained mycophenolic  
143 acid (MPA), xanthine and hypoxanthine, and were plaque-purified in the *gpt* selection medium  
144 four times until the respective purified recombinant viruses were obtained. PCR reactions were  
145 used to verify the purity of these recombinant viruses. The primer sequences used for the PCR  
146 reactions are:

147 TK-F2: 5'-TGTGAAGACGATAAATTAATGATC-3';

148 pCB-R3: 5'-ACCTGATGGATAAAAAGGCG-3';

149 TK-F4: 5'-TTGTCATCATGAACGGCGGA-3';

150 TK-R4: 5'-TCCTTCGTTTGCCATACGCT-3';

151 GM-F: 5'-GGCATTGTGGTCTACAGCCT-3';

152 GM-R: 5'-GTGTTTCACAGTCCGTTTCCG-3';

153 TK-F5: 5'-GAACGGGACTATGGACGCAT-3';

154 TK-R5: 5'-TCGGTTTCCTCACCCAATCG-3'.

155 **Cytokine assays**

156 Cells were infected with various viruses at a MOI of 10 for 1 h or mock infected. The inoculum  
157 was removed and the cells were washed with PBS twice and incubated with fresh medium.  
158 Supernatants were collected at various times post infection. Cytokine levels were measured by  
159 using enzyme-linked immunosorbent assay (ELISA) kits for murine IFN- $\alpha/\beta$  (PBL Biomedical  
160 Laboratories), IL-6, CCL5, CXCL10, and GM-CSF (R & D systems).

161

162 **Western Blot Analysis**

163 B16-F10 cells were infected with OV-GM at a MOI of 10, and cell lysates was collected at  
164 different time points after virus infection. Polypeptides were separated by 15% SDS-PAGE, and  
165 western blot analysis was performed to determine the expression of mGM-CSF using anti-mGM-  
166 CSF antibody (Thermo Fisher). GAPDH was used as a loading control.

167

168 **mGM-CSF bioactivity assay**

169 B16-F10 cells were infected with OV-GM at a MOI of 10 for 1 hour in a 6-well plate, and the  
170 inoculum was removed and cells were washed with PBS. Fresh medium was added to the well,  
171 and the culture supernatants were collected at 24 hours after virus infection. The supernatant was  
172 UV irradiated and filtered through a 0.2  $\mu\text{m}$  syringe filter (Nalgene). Different dilutions of the  
173 supernatants were added to bone marrow cells in RPMI medium. Generation of bone marrow  
174 derived dendritic cells (BMDCs) was described previously. After 7 days, cultured DCs were  
175 fixed with Fix Buffer I (BD Biosciences) for 15 min at 37°C. Cells were washed, permeabilized  
176 with PermBuffer (BD Biosciences) for 30 min on ice, and stained with antibodies against CD11c  
177 and CD11b for 30 min. Cells were analyzed using the LSRII Flow cytometer (BD Biosciences)  
178 for CD11c<sup>+</sup> DCs. Data were analyzed with FlowJo software (Treestar).

179

180 **Flow cytometry analysis of DC maturation**

181 For DC maturation analysis, BMDCs were generated from C57BL/6J mice and infected with either  
182 live OV or live OV-GM at a MOI of 10 or with equivalent amounts of heat-iOV-GM. Cells were

183 collected at 14 h post infection and were then fixed with Fix Buffer I (BD Biosciences) for 15 min  
184 at 37°C. Cells were washed, permeabilized with PermBuffer (BD Biosciences) for 30 min on ice,  
185 and stained with antibodies against MHC Class I, CD40, CD86, and CD80 for 30 min. Cells were  
186 analyzed using the LSRII Flow cytometer (BD Biosciences). Data were analyzed with FlowJo  
187 software (Treestar).

188

### 189 **Tumor re-challenge to assess the development of systemic antitumor immunity**

190 The surviving mice (8 weeks after tumor eradication) were re-challenged with intravenous  
191 delivery of a lethal dose of B16-F10 ( $1 \times 10^5$  cells in 50  $\mu$ l PBS) and then euthanized at 3 weeks  
192 post re-challenge to evaluate the presence of tumor foci on the surface of lungs

193

### 194 **ELISPOT assay**

195 Spleens were harvested from mice treated with different viruses, and were mashed through a 70  
196  $\mu$ m strainer (Thermo Fisher Scientific). Red blood cells were lysed using ACK Lysis Buffer  
197 (Life Technology) and the cells were re-suspended in RPMI medium. CD8<sup>+</sup> T cells were then  
198 purified using CD8a (Ly-2) MicroBeads from Miltenyi Biotechnology. Enzyme-linked  
199 ImmunoSpot (ELISPOT) assay was performed to measure IFN- $\gamma$ <sup>+</sup> CD8<sup>+</sup> T cells according to the  
200 manufacturer's protocol (BD Bioscience). CD8<sup>+</sup> T cells were mixed with irradiated B16 cells at  
201 1:1 ratio (250,000 cells each) in RPMI medium, and the ELISPOT plate was incubated at 37°C  
202 for 16 hours before staining.

203

### 204 **Preparation of single cell suspensions from tumor samples**

205 B16-F10 melanoma cells were implanted intradermally to the right and left flanks of C57BL/6J  
206 mice ( $5 \times 10^5$  cells to the right flank and  $2.5 \times 10^5$  cells to the left flank). PBS, OV, live OV-GM,  
207 or heat-iOV-GM viruses ( $2 \times 10^7$  pfu) were injected IT into the tumors on the right flanks 7 days  
208 after tumor implantation. The injections were repeated once 3 days later. Tumors were harvested  
209 three days after the second injection with forceps and surgical scissors and were weighed. They  
210 were then minced prior to incubation with Liberase (1.67 Wünsch U/ml) and DNase (0.2 mg/ml)  
211 in serum free RPMI for 30 minutes at 37°C. Cell suspensions were generated by mashing  
212 through a 70 $\mu$ m nylon filter, and then washed with complete RPMI.

213



## 214 **Flow cytometry analysis of tumor infiltrating immune cells**

215 Cells were processed for surface labeling with anti-CD3, CD45, CD4, and CD8 antibodies. Live  
216 cells are distinguished from dead cells by using fixable dye eFluor506 (eBioscience). They were  
217 further permeabilized using permeabilization kit (eBioscience) and stained for Granzyme B. Data  
218 were acquired using the LSRII Flow cytometer (BD Biosciences). Data were analyzed with  
219 FlowJo software (Treestar).

220

## 221 **RNA isolation and quantitative real-time PCR**

222 B16-F10 melanoma cells were implanted into the right and left flanks of C57BL/6J mice ( $5 \times 10^5$   
223 cells into the right flank and  $2.5 \times 10^5$  cells into the left flank). PBS, OV, live OV-GM, or heat-  
224 iOV-GM viruses were injected IT into the right-side tumors 7 days after tumor implantation. The  
225 injection was repeated once 3 days after the first injection. Three days after the second injection,  
226 tumors were harvested from euthanized mice with forceps and surgical scissors and minced.  
227 RNA was extracted from the tumor lysates with a RNeasy Mini kit (Qiagen) and was reverse  
228 transcribed with a First Strand cDNA synthesis kit (Fermentas). Quantitative real-time PCR was  
229 performed in triplicate with SYBR Green PCR Mater Mix (Life Technologies) and Applied  
230 Biosystems 7500 Real-time PCR Instrument (Life Technologies) using gene-specific primers.  
231 Relative expression was normalized to the levels of glyceraldehyde-3-phosphate dehydrogenase  
232 (GAPDH). The primer sequences for quantitative real-time PCR are:

233 Ifnb-F: 5'-TGGAGATGACGGAGAAGATG-3';

234 Ifnb-R: 5'-TTGGATGGCAAAGGCAGT-3';

235 Il6-F: 5'-AGGCATAACGCACTAGGTTT-3';

236 IL6-R: 5'-AGCTGGAGTCACAGAAGGAG-3';

237 Ccl4-F: 5'-GCCCTCTCTCCTCTTGCT-3';

238 Ccl4-R: 5'-CTGGTTCATAGTAATCCATC-3';

239 Ccl5-F: 5'-GCCACGTCAAGGAGTATTTCTA-3';

240 Ccl5-R: 5'-ACACACTTGGCGGTTCCCTTC-3';

241 Cxcl9-F: 5'-GGAACCCTAGTGATAAGGAATGCA-3';

242 Cxcl9-R: 5'-TGAGGTCTTTGAGGGATTTGTAGTG-3';

243 Cxcl10-F: 5'-GTCAGGTTGCCTCTGTCTCA-3';

244 Cxcl10-R: 5'-TCAGGGAAGAGTCTGGAAAG-3';  
245 GAPDH-F: 5'-ATCAAGAAGGTGGTGAAGCA-3';  
246 GAPDH-R: 5'-AGACAACCTGGTCCTCAGTGT-3'

247

### 248 **Unilateral intradermal tumor implantation and intratumoral injection with viruses**

249 All mouse procedures were performed in strict accordance with the recommendations in the  
250 Guide for the Care and Use of Laboratory Animals of the National Institute of Health. The  
251 protocol was approved by the Committee on the Ethics of Animal Experiments of Sloan-  
252 Kettering Cancer Institute. B16-F10 melanoma cells ( $1 \times 10^5$  cells in a volume of 50  $\mu$ l PBS) were  
253 implanted intradermally into the shaved skin on the right flank of WT C57BL/6J or Batf3<sup>-/-</sup> mice.  
254 After 7-8 days post implantation, when the tumors reach 3 mm in diameter, they were injected  
255 with PBS, live OV-GM ( $2 \times 10^7$  pfu), or with equivalent amounts of heat-iOV-GM when the  
256 mice were under anesthesia. Viruses were injected twice weekly. Mice survival was monitored,  
257 and tumor sizes were measured twice a week. Tumor volumes were calculated according the  
258 following formula: L (length) x W (width) x H (height)/2. Mice were euthanized for signs of  
259 distress or when the diameter of the tumor reached 10 mm. Treatments were ended when mice  
260 died/euthanized or tumors completely disappeared.

261

262 For combination therapy of large tumors, the first injection started when tumor size reaches 5  
263 mm in diameter. Anti-PD-L1 (200  $\mu$ g per mouse) or isotype control were given intraperitoneally  
264 to the mice concurrent with virus treatment throughout the course of study.

265

### 266 **Bilateral tumor implantation model and assessment of therapeutic efficacy of combination 267 therapy with IT injection with viruses plus ICB**

268 B16-F10 melanoma cells were implanted intradermally to the left and right flanks of C57BL/6J  
269 mice ( $5 \times 10^5$  to the right flank and  $1 \times 10^5$  to the left flank). 7-8 days after tumor implantation,  
270 when tumor sizes reach 3 mm in diameter at the right flanks, live OV-GM ( $2 \times 10^7$  pfu) or  
271 equivalent amounts of heat-iOV-GM were injected IT into the larger tumors on the right flanks.  
272 The tumors were injected twice a week concurrently with intraperitoneal delivery of anti-CTLA-  
273 4 (100  $\mu$ g per mouse) or isotype control antibodies. The tumor sizes were measured, and the  
274 survival of mice was monitored. Mice were euthanized for signs of distress or when the diameter

275 of the tumor reached 10 mm. Treatments were ended when mice died/euthanized or tumors  
276 completely disappeared.

277

## 278 **Statistics**

279 Two-tailed unpaired Student's *t* test was used for comparisons of two groups in the studies.

280 Survival data were analyzed by log-rank (Mantel-Cox) test. The *p* values deemed significant are  
281 indicated in the figures as follows: \*,  $p < 0.05$ ; \*\*,  $p < 0.01$ ; \*\*\*,  $p < 0.001$ ; \*\*\*\*,  $p < 0.0001$ .

282 The numbers of animals included in the study are discussed in each figure legend.

283

## 284 **Reagents**

285 The commercial sources for reagents were as follows: Antibodies used for flow cytometry were

286 purchased from eBioscience (Live/Dead eFluor 506, CD45.2 Alexa Fluor 700, CD3 PE-Cy7,

287 CD4 Pacific blue-eFluor 450, CD8 PerCP-eFluor710, CD11b APC-eFluor 780, MHC Class I

288 APC, CD40 APC, CD80 APC, CD86 APC), Invitrogen (Granzyme B PE-Texas Red), BD

289 Pharmingen (CD11c-PE-Cy7). Murine anti-GM-CSF antibody was purchase from Thermo

290 Fisher. DNase I and Liberase TL were purchased from Roche. Recombinant murine GM-CSF

291 protein was purchased from GenScript. Therapeutic anti-CTLA4 (clone 9H10 and 9D9) and anti-

292 PD-L1 (clone 10F.9G2) were purchased from BioXcell.

293

294

## 295 **Results**

296 **Generation of oncolytic vaccinia virus expressing murine granulocyte-macrophage colony-**  
297 **stimulating factor (mGM-CSF).** Oncolytic vaccinia viruses with the deletion of thymidine  
298 kinase (TK<sup>-</sup>) are more attenuated and more tumor-selective than TK<sup>+</sup> viruses<sup>41 42</sup>. Here, we  
299 generated a recombinant TK<sup>-</sup> oncolytic vaccinia virus expressing mGM-CSF under the control of  
300 a vaccinia synthetic early/late promoter (PsE/L) ([figure. 1A](#)). VACV-E3LΔ83N virus was used  
301 as the parental virus (OV-TK<sup>+</sup>). Two recombinant viruses with the loss of part of the TK gene  
302 and with and without mGM-CSF (OV and OV-GM) were generated and verified by PCR  
303 analyses and sequencing ([Supplementary figure. 1A](#)). The replication capacities of OV-TK<sup>+</sup>, OV,  
304 and OV-GM in murine B16-F10 cells were determined by infecting them at a MOI of 0.01. OV-  
305 TK<sup>+</sup> replicated efficiently in B16-F10 cells with viral titers increasing by 20,000-fold at 72 h post  
306 infection compared with the viral titers at 1 h post infection ([figure. 1B](#)). Deletion of the TK gene  
307 resulted in a 3-fold decrease in viral replication efficiency in B16-F10 melanoma cells compared  
308 with the parental virus. In addition, OV-GM replicated efficiently in murine B16-F10 cells, with  
309 a 2800-fold increase of viral titers at 72 h post infection ([figure. 1B](#)).

310  
311 To test the expression of mGM-CSF from the OV-GM recombinant viruses, we infected B16-  
312 F10 murine melanoma cells with OV-GM at a MOI of 10. Western blot analyses showed the  
313 levels of expression of mGM-CSF in both the cell lysates and in the supernatants  
314 ([Supplementary figure. 1B](#)) at 24 h post infection. The bioactivity of the secreted mGM-CSF was  
315 tested by culturing murine bone marrow cells ( $2.5 \times 10^5$ ) with serial dilution of supernatants  
316 obtained from B16-F10 infected with OV-GM (collected at 24 h post infection) or with  
317 recombinant mGM-CSF protein (20 ng/ml) for 7 days. The total numbers of CD11c<sup>+</sup> cells  
318 cultured in different conditions are shown ([Supplementary figure. 1C](#)). We found that 1:400  
319 dilution of the supernatants collected from OV-GM-infected B16-F10 cells had similar  
320 bioactivity to recombinant mGM-CSF (20 ng/ml) ([Supplementary figure. 1C](#)). ELISA was used  
321 to determine the concentrations of mGM-CSF in the supernatants collected from B16-F10  
322 murine melanoma cells and SK-MEL31 human melanoma cells infected with either live OV or  
323 live OV-GM at a MOI of 10, or with equivalent amounts of heat-iOV-GM, at 22 h post infection.  
324 The concentrations of mGM-CSF in the supernatants of B16-F10 and SK-MEL31 cells infected

325 with live OV-GM were determined to be 1400 ng/ml and 1200 ng/ml, respectively (figure. 1C).  
326 As expected, heat-iOV-GM infection failed to induce mGM-CSF secretion (figure. 1C).

327

328 **Heat-inactivated OV-GM (heat-iOV-GM) induces innate immunity in bone marrow-**  
329 **derived dendritic cells (BMDCs) and tumor cells, whereas live OV or live OV-GM does not.**

330 We compared the abilities of live OV, live OV-GM, or heat-iOV-GM to induce innate immunity  
331 in BMDCs, B16-F10 murine melanoma cells, and MC38 murine colon cancer cells. BMDCs  
332 from WT and STING<sup>Gt/Gt</sup> mice were infected with either live OV or live OV-GM at a MOI of 10,  
333 or with equivalent amounts of heat-iOV-GM. Supernatants were collected at 22 h post infection.  
334 The concentrations of IFN- $\beta$ , CCL5, and CXCL10 were determined by ELISA. Whereas live OV  
335 or live OV-GM infection failed to induce IFN- $\beta$  or CXCL10, and only slightly induced CCL5  
336 above background levels, heat-iOV-GM strongly induced IFN- $\beta$ , CCL5, and CXCL10 in a  
337 STING-dependent manner (figure. 1D). Western blot analyses showed that infection of BMDCs  
338 with live OV-GM at a MOI of 10 triggered only low levels of phosphorylation of TBK1 and  
339 IRF3 at 4 and 6 h post infection, which is dependent on STING. By contrast, infection of  
340 BMDCs with heat-iOV-GM strongly induced phosphorylation of TBK1 and IRF3 at 4 and 6 h  
341 post infection, which is largely dependent on STING (figure. 1E). FACS analyses of BMDCs  
342 infected with either live OV, or live OV-GM, or heat-iOV-GM for 14 h revealed that heat-iOV-  
343 GM infection induced the expression level of surface protein levels of MHC class I, CD40,  
344 CD86, and CD80 on BMDCs, which are markers of DC maturation. By contrast, live OV or live  
345 OV-GM infection resulted in a modest induction of CD86 and CD80 and a reduction of the  
346 expression of MHC class I on BMDCs compared with mock treatment control (NT) (figure. 1F).  
347 These results indicate that whereas heat-iOV-GM infection of BMDCs induces innate immune  
348 responses via the STING-mediated cytosolic DNA-sensing pathway and activates DC  
349 maturation, live OV or live OV-GM infection fails to do so.

350

351 We also observed that similar findings in murine B16-F10 melanoma and MC38 colon cancer  
352 cells infected with either live OV, live OV-GM, or heat-iOV-GM. Heat-iOV-GM infection  
353 potently induced IFN- $\beta$  and CCL5 secretion from B16-F10 (figure. 1G) and MC38 (figure. 1H),  
354 but live OV or live OV-GM infection did not.

355

356 **The antitumor effects induced by IT live OV-GM are dependent on Batf3-dependent**  
357 **CD103<sup>+</sup> dendritic cells (DCs).** IT heat-iMVA-induced antitumor effects require Batf3-  
358 dependent DCs<sup>39</sup>. Here we used a B16-F10 melanoma unilateral implantation model to test  
359 whether live OV-GM also requires Batf3-dependent DCs for antitumor effects. Briefly, B16-F10  
360 melanoma cells ( $5 \times 10^5$  cells) were implanted intradermally into the right flanks of Batf3<sup>-/-</sup> or  
361 wild type (WT) C57BL/6J mice. Seven days after tumor implantation, we injected live OV-GM  
362 ( $2 \times 10^7$  pfu) or equivalent amounts of heat-iOV-GM into the tumors on the right flank twice  
363 weekly (figure. 2A). We found that IT live OV-GM is effective in delaying tumor growth or  
364 eradicating tumors in WT mice, resulting in a 64% survival rate (figure. 2B-C). By contrast, IT  
365 live OV-GM is ineffective in Batf3<sup>-/-</sup> mice, resulting in 0% survival rate. The results are almost  
366 indistinguishable from the PBS-treated group with median survival of 17 days in both groups  
367 (figure. 2B-C). IT heat-iOV-GM is highly effective in WT mice, resulting in a 92% survival rate,  
368 but its efficacy was reduced in Batf3<sup>-/-</sup> mice, resulting in 0% survival rate. However, there was an  
369 extension of median survival from 17 days in the PBS-treated WT mice to 25 days in the heat-  
370 iOV-GM-treated Batf3<sup>-/-</sup> mice (figure. 2B-C). These results are similar to what we reported  
371 previously for heat-iMVA<sup>39</sup>. These findings indicate that the antitumor effects of oncolytic DNA  
372 virus in a unilateral tumor implantation model require Batf3-dependent CD103<sup>+</sup> DCs but not  
373 viral replication and oncolysis itself. IT heat-iOV-GM is more effective than live OV-GM in  
374 eradicating injected tumors, which is likely due to its enhanced ability to induce DC activation  
375 and the induction of type I IFN, proinflammatory cytokines, and chemokines in both DCs and  
376 tumor cells<sup>39</sup>. Both heat-iOV-GM and heat-iMVA fail to express viral inhibitory proteins that  
377 antagonize innate immune sensing mechanisms. We expect that these two inactivated viruses  
378 behave similarly: (i) they enter tumor, stromal, and immune cells in the injected tumors, and (ii)  
379 viral DNAs gain access to the cytoplasm of infected cells to trigger potent innate immune  
380 responses, partly through the activation of the cytosolic DNA-sensing pathway. Therefore, IT  
381 heat-iOV-GM leads to the alteration of tumor immunosuppressive microenvironment and  
382 enhanced tumor antigen presentation by the CD103<sup>+</sup> DCs in the tumor-draining lymph nodes  
383 (TDLNs).

384

385 **IT heat-iOV-GM is more effective in generating long-lasting memory responses against**  
386 **tumor rechallenge in a different organ system compared with IT live OV-GM.** IT heat-

387 iMVA-treatment of mice with B16-F10 tumors generates potent systemic antitumor immunity,  
388 which results in the rejection of tumor rechallenge through the intravenous (IV) route<sup>39</sup>. Here we  
389 compared the efficacy of IT heat-iOV-GM vs. IT live OV-GM in generating systemic antitumor  
390 memory responses. IV injection of B16-F10 melanoma cells ( $1 \times 10^5$  cells per mouse) into the  
391 surviving mice that were treated previously either with IT heat-iOV-GM or live OV-GM was  
392 performed at 8 weeks after the original tumors were eradicated. Mice were euthanized three  
393 weeks after rechallenge and the lungs were evaluated under a dissecting microscope for tumor  
394 foci on the lung surfaces. Whereas the naïve mice developed an average of 24 tumor foci on the  
395 lung surfaces, 5 out of 14 live OV-GM-treated mice failed to develop tumors (with an average of  
396 4 tumor foci on each of the 14 mice), and 10 out of 13 heat-iOV-GM mice rejected tumor  
397 challenges (with an average of 0.8 tumor foci on each of the 13 mice) (figure. 2D). These results  
398 indicate that IT heat-iOV-GM generated stronger systemic antitumor long-lasting memory  
399 immune responses than IT live OV-GM.

400

401 **IT heat-iOV-GM induces higher levels of activated CD8<sup>+</sup> and CD4<sup>+</sup> T cells in the non-**  
402 **injected distant tumors compared with IT live OV-GM.** To understand why IT heat-iOV-GM  
403 is more effective than live OV-GM in generating antitumor effects, especially in the non-injected  
404 distant tumors, we investigated the immune cell infiltrates in both the injected and non-injected  
405 tumors in IT heat-iOV-GM or live OV-GM-treated mice. We intradermally implanted  $2.5 \times 10^5$   
406 B16-F10 melanoma cells to the left flank and  $5 \times 10^5$  B16-F10 melanoma cells into the right  
407 flank of the mice. Seven days post tumor implantation, we injected either  $2 \times 10^7$  pfu of OV, OV-  
408 GM, heat-iOV-GM, or PBS into the larger tumors on the right flank. The injection was repeated  
409 three days later. Both the injected and non-injected tumors were harvested, and cell suspensions  
410 were generated (figure. 3A). We analyzed the live immune cell infiltrates in the tumors by  
411 FACS. IT live OV-GM generated higher percentages of Granzyme B<sup>+</sup> CD8<sup>+</sup> T cells compared  
412 with IT live OV in the distant non-injected tumors (78% in the OV-GM group compared with  
413 56% in the OV group and 54% in the PBS mock-treatment group), although both viruses were  
414 highly efficient in the generation of Granzyme B<sup>+</sup> CD8<sup>+</sup> T cells in the injected tumors (figure.  
415 3B, 3C). In addition, IT live OV-GM generated higher percentages of Granzyme B<sup>+</sup> CD4<sup>+</sup> T  
416 cells compared with IT live OV in the distant non-injected tumors (31% in the OV-GM group  
417 compared with 16% in the OV group and 13% in the PBS mock-treatment group) (figure. 3D,

418 **3E)**. In the injected tumors, IT live OV-GM also generated higher percentages of Granzyme B<sup>+</sup>  
419 CD4<sup>+</sup> T cells compared with IT live OV (96% in the OV-GM group compared with 79% in the  
420 OV group and 11% in the PBS mock-treatment group) (**figure. 3D, 3E**). These results indicate  
421 that the expression and secretion of GM-CSF from OV-GM-infected tumor cells have an  
422 immune adjuvant effect. However, IT heat-iOV-GM induced higher percentages of Granzyme B<sup>+</sup>  
423 CD8<sup>+</sup> T cells and Granzyme B<sup>+</sup> CD4<sup>+</sup> T cells compared with live OV-GM or live OV in the  
424 distant non-injected tumors (94% Granzyme B<sup>+</sup> CD8<sup>+</sup> T cells and 62% Granzyme B<sup>+</sup> CD4<sup>+</sup> T  
425 cells in the heat-iOV-GM group compared with 78% Granzyme B<sup>+</sup> CD8<sup>+</sup> T cells and 31%  
426 Granzyme B<sup>+</sup> CD4<sup>+</sup> T cells in the live OV-GM group) (**figure. 3B-E**).

427

428 **IT heat-iOV-GM induces higher numbers of antitumor CD8<sup>+</sup> T cells in the spleens of**  
429 **treated tumor-bearing mice compared with IT live OV-GM.** To test whether IT heat-iOV-  
430 GM is more effective in generating systemic antitumor immunity compared with IT live OV-  
431 GM, we analyzed tumor-specific CD8<sup>+</sup> T cells in the spleens of tumor-bearing mice treated with  
432 either OV, live OV-GM, heat-iOV-GM, or PBS control as described above in a murine B16-F10  
433 bilateral tumor implantation model. Enzyme-linked ImmunoSpot (ELISpot) assay was  
434 performed. Briefly, CD8<sup>+</sup> T cells were isolated from splenocytes and 2.5 x 10<sup>5</sup> cells were  
435 cultured overnight at 37°C in an anti-IFN-γ-coated BD ELISPOT microwells plate. CD8<sup>+</sup> T Cells  
436 were stimulated with B16-F10 cells that were irradiated with an γ-irradiator, and cytokine  
437 secretion was detected with an anti-IFN-γ antibody. Whereas CD8<sup>+</sup> T cells from PBS or OV-  
438 treated tumor-bearing mice barely showed any reactivity to B16-F10 cells, CD8<sup>+</sup> T cells from  
439 live OV-GM-treated mice showed some reactivity to B16-F10 cells (**figure. 3F-G**). By contrast,  
440 heat-iOV-GM-treated mice showed much higher numbers of IFN-γ<sup>+</sup> spots compared with OV,  
441 live OV-GM, or PBS-treated mice, with an average of 126 IFN-γ<sup>+</sup> spots in the heat-iOV-GM  
442 group vs. 16 IFN-γ<sup>+</sup> spots in the live OV-GM group vs. 4 IFN-γ<sup>+</sup> spots in the OV or PBS group  
443 (**figure. 3F-G**). Similar experiments were performed in MC38 murine colon cancer model and we  
444 found that IT heat-iOV-GM generated higher numbers of IFN-γ<sup>+</sup> spots compared with live OV-  
445 GM-treated mice (**Supplementary figure. 2A and B**). Taken together, these results indicate that  
446 IT heat-iOV-GM is more potent compared with live OV-GM in promoting the generation of  
447 tumor-specific activated CD8<sup>+</sup> and CD4<sup>+</sup> T cells, which are then recruited to inflamed non-  
448 injected distant tumors.



449

450 **Batf3-dependent CD103<sup>+</sup> DCs and the STING-mediated cytosolic DNA-sensing pathway**  
451 **are required for the induction of tumor-specific CD8<sup>+</sup> T cells in the spleens of IT heat-iOV-**  
452 **GM-treated mice.** We have previously shown that Batf3-dependent CD103<sup>+</sup> DCs are critical for  
453 the generation of antitumor CD8<sup>+</sup> T cells in the TDLNs and the recruitment of CD8<sup>+</sup> and CD4<sup>+</sup> T  
454 cells into injected and non-injected distant tumors in response to IT heat-iMVA<sup>39</sup>. The STING  
455 pathway also plays an important role in this process<sup>39</sup>. Here, we tested whether Batf3-dependent  
456 CD103<sup>+</sup> DCs and STING are involved in the generation of tumor-specific CD8<sup>+</sup> T cells in the  
457 spleens. We found that IT heat-iOV-GM resulted in higher numbers of IFN- $\gamma$ <sup>+</sup> spots in WT mice  
458 compared with STING<sup>Gt/Gt</sup> mice, with an average of 80 IFN- $\gamma$ <sup>+</sup> spots in the heat-iOV-GM-treated  
459 WT mice and 47 IFN- $\gamma$ <sup>+</sup> spots in the heat-iOV-GM-treated STING<sup>Gt/Gt</sup> mice (figure. 3H-I). As  
460 expected, IT heat-iOV-GM failed to generate IFN- $\gamma$ <sup>+</sup> spots in the Batf3<sup>-/-</sup> mice (figure. 3H-I).  
461 These results further support that IT heat-iOV-GM activates the STING-mediated cytosolic  
462 DNA-sensing pathway in Batf3-dependent CD103<sup>+</sup> DCs to generate systemic antitumor  
463 immunity.

464

465 **IT heat-iOV-GM induces stronger innate immune responses in the injected tumors**  
466 **compared with live OV-GM.** We hypothesized that IT heat-iOV-GM leads to stronger  
467 induction of innate immunity in the infected tumor cells and tumor-infiltrating immune cells,  
468 compared with IT live OV-GM. To test that, we intradermally implanted B16-F10 melanoma  
469 cells into the right flank of C57BL/6J mice; once the tumors were 3-4 mm in diameter, they were  
470 injected with either 2 x 10<sup>7</sup> pfu of live OV-GM or equivalent amounts of heat-iOV-GM. PBS  
471 was used as a control. Tumors were harvested one day post infection and mRNAs were  
472 extracted. Quantitative real-time PCR analyses of the expression of *Ifnb*, *Il6*, *Ccl4*, *Ccl5*, *Cxcl9*  
473 and *Cxcl10* genes were performed. Whereas IT live OV-GM resulted in modest induction of  
474 innate immune responses in the injected tumors compared with IT PBS control, IT heat-iOV-GM  
475 resulted in stronger induction of *Ifnb*, *Il6*, *Cc4*, *Ccl5*, *Cxcl9*, and *Cxcl10* compared with IT live  
476 OV-GM (Supplementary figure. 3A-F).

477

478 **IT heat-iOV-GM induces higher levels of IFN and proinflammatory cytokines and**  
479 **chemokines in distant non-injected tumors compared with live OV or live OV-GM.** Here we

480 compared the innate immunity generated in non-injected distant tumors in mice treated with  
481 either IT heat-iOV-GM, live OV-GM, or live OV. Briefly, B16-F10 melanoma cells were  
482 implanted intradermally to the left and right flanks of C57BL/6J mice ( $2.5 \times 10^5$  and  $5 \times 10^5$   
483 cells, respectively). Seven days after tumor implantation, IT injection of  $2 \times 10^7$  pfu of OV, OV-  
484 GM, heat-iOV-GM, or PBS was carried out into the larger tumors on the right flank. The  
485 injections were repeated 3 days later. The non-injected tumors on the left flank were harvested 2  
486 days after the last injection, and mRNAs were extracted from the tumor tissue. Quantitative real-  
487 time PCR analyses were performed (figure. 4A). IT heat-iOV-GM resulted in the induction of  
488 higher levels of *Ifnb*, *Il6*, *Ccl4*, *Ccl5*, *Cxcl9*, and *Cxcl10* gene expression in the non-injected  
489 distant tumors compared with those mice treated with either live OV-GM, live OV, or PBS  
490 control (figure. 4B). These results indicate that IT heat-iOV-GM induces stronger innate immune  
491 activation at the non-injected distant tumors compared with IT live OV-GM. Whereas IT live  
492 OV is not effective in inducing innate immunity at the non-injected distant tumors compared  
493 with PBS mock-treatment control, IT live OV-GM induces slightly higher innate immune  
494 responses in the distant non-injected tumors compared with IT live OV (figure. 4B).

495  
496 To make sure our observation is not limited to B16-F10 melanoma, we performed similar  
497 experiments in a MC38 murine colon cancer model. We confirmed that IT heat-iOV-GM  
498 induced higher levels of *Ifnb*, *Il6*, *Ccl4*, *Ccl5*, *Cxcl9*, and *Cxcl10* gene expression in both injected  
499 tumors (harvested at one day post first injection) and non-injected tumors (harvested two days  
500 post second injection) compared with IT live OV-GM (Supplementary figure. 4A-F).

501  
502 **STING and Batf3-dependent CD103<sup>+</sup> DCs contribute to the induction of IFN and**  
503 **proinflammatory cytokines and chemokines by IT heat-iOV-GM in distant non-injected**  
504 **tumors.** We hypothesized that the cytosolic DNA-sensing pathway in the Batf3-dependent  
505 CD103<sup>+</sup> DCs might be important for the induction of type I IFN and proinflammatory cytokines  
506 and chemokines in response to tumor DNA released from the dying tumor cells. To test that, we  
507 intradermally implanted B16-F10 melanoma cells into the left and right flanks of Batf3<sup>-/-</sup>,  
508 STING<sup>Gt/Gt</sup>, and WT C57BL/6J mice ( $2.5 \times 10^5$  and  $5 \times 10^5$  cells, respectively). Seven days after  
509 tumor implantation, heat-iOV-GM (an equivalent amount of  $2 \times 10^7$  pfu of the live virus) or PBS  
510 was injected into the larger tumors on the right flank of the mice, with a total of two injections, 3

511 days apart. The non-injected tumors from the left flank of *Batf3*<sup>-/-</sup>, *STING*<sup>Gt/Gt</sup>, and WT mice  
512 were harvested at day 3 post the last injection (figure. 4A). Quantitative real-time PCR analyses  
513 showed that the induction of *Ifnb*, *Il6*, *Ccl4*, *Ccl5*, *Cxcl9*, and *Cxcl10* gene expression in the non-  
514 injected distant tumors of WT mice treated with IT heat-iOV-GM was reduced in *STING*<sup>Gt/Gt</sup>  
515 mice and abolished in *Batf3*<sup>-/-</sup> mice (figure. 4C). These results indicate that STING and *Batf3*-  
516 dependent CD103<sup>+</sup> DCs play important roles in the induction of IFN and proinflammatory  
517 cytokines and chemokines by IT heat-iOV-GM in distant non-injected tumors.

518

519 **CD8<sup>+</sup> T cells are required for the induction of innate immune responses in the distant non-**  
520 **injected tumors.** We have previously shown that CD8<sup>+</sup> T cells are required for heat-iMVA-  
521 induced antitumor effects<sup>39</sup>, whereas CD4<sup>+</sup> T cells are important for the generation of antitumor  
522 memory responses. To determine the relative contribution of CD8<sup>+</sup> and CD4<sup>+</sup> T cells in  
523 mediating innate-immune activation in the non-injected tumors, we either depleted CD8<sup>+</sup> or  
524 CD4<sup>+</sup> T cells individually or together by administering anti-CD8 and/or CD4 antibodies via  
525 intraperitoneal (IP) route one day prior to intratumoral injection of heat-iOV-GM. Two days after  
526 the second injection, we isolated the non-injected tumors and performed RT-PCR analyses  
527 (figure. 4D). Flow cytometry analyses showed that intratumoral CD4<sup>+</sup> and CD8<sup>+</sup> T cells were  
528 depleted as expected (Supplementary figure. 5). We found that depleting CD8<sup>+</sup> T cells alone  
529 abolished *Ifnb*, *Il6*, *Ccl5*, and *Cxcl10* gene expression in non-injected tumors, whereas depleting  
530 CD4<sup>+</sup> T cells had moderate reduction (figure. 4E). These results indicate that cytotoxic CD8<sup>+</sup> T  
531 cells induced after heat-iOV-GM injection elicit tumor killing in the non-injected tumors and  
532 resulting the induction of innate immunity.

533

534 **IT heat-iOV-GM generated stronger therapeutic efficacy compared with IT live OV-GM in**  
535 **a B16-F10 bilateral tumor implantation model in the presence or absence of anti-CTLA-4**  
536 **antibody.** Here we investigate the therapeutic efficacy induced by heat-iOV-GM in comparison  
537 with live OV-GM in a bilateral tumor implantation model, and whether its combination with  
538 systemic delivery of immune checkpoint blockade can further improve the treatment outcome.  
539 We implanted B16-F10 cells intradermally into the flanks of C57BL/6J mice, with 5 x 10<sup>5</sup> to the  
540 right flanks and 1 x 10<sup>5</sup> to the left flanks, and started virus treatment 7-8 days after tumor  
541 implantation, when tumor size reaches 3 mm in diameter at the right flanks. Intratumoral

542 injection of either PBS, Live-OV-GM or heat-iOV-GM were given to the tumors on the right  
543 flanks twice a week, combined with intraperitoneal (IP) delivery of either anti-CTLA-4 antibody  
544 or isotype control. Tumors on the left flanks were not injected with virus. We monitored tumor  
545 growth and mice survival (figure 5A). Without anti-CTLA-4 antibody, heat-iOV-GM-treated  
546 mice showed improved tumor growth control and survival compared with those treated with live  
547 OV-GM, with the extension of median survival from 16.5 days in live OV-GM-treated group to  
548 28 days in heat-iOV-GM treated group (figure 5B and 5C). Combination with immune  
549 checkpoint blockade further enhances the abscopal anti-tumor effect induced by heat-iOV-GM.  
550 The heat-iOV-GM and anti-CTLA4 combination treatment resulted in a delayed tumor growth  
551 and higher rate of tumor regression in the distant tumor compared with the Live-OV-GM and  
552 anti-CTLA-4 combination therapy (figure 5C). The cure rate in the heat-iOV-GM plus anti-  
553 CTLA4 group was 80%, which is higher than the 40% cure rate in the Live-OV-GM plus anti-  
554 CTLA-4 treatment group (figure 5D).

555 **Heat-iOV-GM and immune checkpoint blockade combination therapy improves**  
556 **therapeutic efficacy in a large established murine B16-F10 tumor model.** We investigated  
557 the therapeutic effect of the combination therapy in an aggressive large tumor model. We  
558 implanted the B16-F10 cells in the right flank of WT C57BL/6J mice and started virus treatment  
559 at a later time point when the tumor size reaches 5 mm in diameter (figure. 6A). While neither  
560 the two virus alone nor Live-OV-GM in combination with anti-PD-L1 eradicated the injected  
561 tumors, the heat-iOV-GM combined with anti-PD-L1 generated strong antitumor effects leading  
562 to tumor regression and elimination in 50% of treated mice (figure. 6B-C). There was an  
563 extension of median survival from 14 days in the live-OV-GM plus anti-PD-L1 treated mice to  
564 32 days in the heat-iOV-GM plus anti-PD-L1 treated mice (figure. 6C). These results  
565 collectively support that heat-iOV-GM is more immunogenic and generates stronger antitumor  
566 effects when combined with ICB compared with live OV-GM plus ICB in both bilateral tumor  
567 implantation and large established aggressive tumor models.

## 568 **Discussion**

569

570 Although IT delivery of oncolytic virus Talimogene Laherparepvec (T-VEC) has been approved  
571 for the treatment of advanced melanoma as a single agent and IT delivery of T-VEC has been  
572 tested in combination with immune checkpoint blockade (ICB) agents in clinical trials for  
573 melanoma and other cancers, our understanding of the contribution of viral replication and  
574 oncolysis to the generation of antitumor immunity by oncolytic DNA viruses is limited.

575

576 In this study, we designed an oncolytic vaccinia virus E3L $\Delta$ 83N-TK<sup>-</sup>-mGM-CSF (OV-GM)  
577 similar to JX594, in which the TK locus was deleted, and the mGM-CSF expression cassette was  
578 inserted. JX594 is a leading oncolytic vaccinia virus that has been tested in many clinical trials  
579 for various cancers<sup>11-15</sup>. We compared the antitumor immunity of IT live OV-GM vs. IT heat-  
580 iOV-GM in both unilateral and bilateral B16-F10 melanoma models, and we found that IT heat-  
581 iOV-GM is more effective than IT live OV-GM in eradicating or delaying the growth of both  
582 injected and non-injected distant tumors in both models. In the bilateral tumor implantation  
583 model, IT heat-iOV-GM induced higher levels of *Ifnb*, *Il6*, *Ccl4*, *Ccl5*, *Cxcl9*, and *Cxcl10* gene  
584 expression in the non-injected distant tumors compared with IT live OV-GM, which correlates  
585 with higher numbers of activated CD4<sup>+</sup> and CD8<sup>+</sup> T cells in the non-injected tumors in mice  
586 treated with IT heat-iOV-GM compared with IT live OV-GM. These results were confirmed in a  
587 different murine tumor model MC38 colon cancer, demonstrating that our findings are not  
588 limited to one tumor type or microenvironment.

589

590 Host type I IFN pathway plays important roles in antitumor immunity<sup>43-45</sup>. Type I IFN signatures  
591 correlate with T cell markers in human melanoma metastases<sup>44</sup>. Preclinical studies have shown  
592 that IFNAR signaling on dendritic cells, specifically CD103<sup>+</sup>/CD8 $\alpha$ <sup>+</sup> DCs can affect antigen  
593 cross-presentation and the generation of antitumor immunity<sup>44 45</sup>. CD103<sup>+</sup> DCs are tumor-  
594 infiltrating DCs, critical for the generation of antitumor immunity, including stimulating naïve  
595 and activated CD8<sup>+</sup> T cells through antigen cross-presentation, and the recruitment of antigen-  
596 specific T cells into TME<sup>46 47</sup>. Our *in vitro* and *in vivo* results support our hypothesis that the  
597 inferiority of live OV or OV-GM stems from its expression of inhibitory viral genes, which leads  
598 to the dampening of type I IFN and pro-inflammatory cytokine and chemokine production in

599 infected bone marrow-derived dendritic cells (BMDCs) and tumor cells. By contrast, heat-  
600 inactivated vaccinia failed to express those inhibitory proteins<sup>39 48</sup>. Similar to what we observed  
601 with heat-iMVA, infection of heat-inactivated OV-GM in BMDCs and tumor cells leads to the  
602 induction of type I IFN, proinflammatory cytokine and chemokine production, whereas live OV  
603 or live OV-GM infection of BMDCs, or B16-F10, or MC38 tumor cells fails to induce the above  
604 mentioned innate immune mediators. Heat-iOV-GM infection of BMDCs induces DC  
605 maturation, whereas live OV or OV-GM infection did not.

606

607 Here we propose the following model to explain the induction of innate immunity by heat-iOV-  
608 GM in the non-injected distant tumors and the immunological mechanisms underlying the  
609 superiority of IT heat-iOV-GM over live OV-GM (Fig. 7). First, compared with Live-OV-GM,  
610 heat-iOV-GM infection leads to stronger induction of type I IFN and proinflammatory cytokines  
611 and chemokines in the injected tumors via the cGAS/STING-dependent mechanism, which  
612 results in stronger activation of CD103<sup>+</sup> DCs and enhanced tumor-antigen presentation in the  
613 TDLNs and spleens. Second, more activated tumor-specific Granzyme B<sup>+</sup> CD8<sup>+</sup> and CD4<sup>+</sup> T  
614 cells are then recruited to the distant non-injected tumors to engage in tumor cell killing in heat-  
615 iOV-GM-treated mice compared with Live-OV-GM-treated mice. Third, the cGAS/STING-  
616 dependent cytosolic-sensing of tumor DNA from dying tumor cells leads to the induction of  
617 innate immunity in the non-injected tumors. Finally, heat-iOV-GM treatment generated stronger  
618 CD8<sup>+</sup> T cells-mediated tumor cell killing and higher levels of *Ifnb*, *Il6*, *Ccl4*, *Ccl5*, *Cxcl9* and  
619 *Cxcl10* gene expression in the non-injected tumors compared with Live-OV-GM. Based on our  
620 findings, we propose that evaluations of both innate and adaptive immunity induced by IT  
621 oncolytic viral immunotherapy at non-injected tumors should be included as potential  
622 biomarkers for comparing potency and efficacy of various oncolytic constructs in preclinical and  
623 clinical studies.

624

625 Our results support that the cGAS/STING-dependent cytosolic-sensing tumor DNA from dying  
626 tumor cells in the non-injected tumors leads to the induction of innate immunity. In the absence  
627 of STING, IT heat-iOV-GM-induced innate immunity in the non-injected tumors was reduced  
628 compared with WT controls, supporting a role of STING in this process. Furthermore, in the  
629 absence of Batf3-dependent CD103<sup>+</sup> DCs, IT heat-iOV-GM-induced innate immunity in the non-

630 injected tumors was abolished. This is consistent with our previous report that in the absence of  
631 CD103<sup>+</sup> DCs, both injected and non-injected tumors failed to recruit anti-tumor CD4<sup>+</sup> and CD8<sup>+</sup>  
632 T cells in response to IT heat-iMVA treatment<sup>39</sup>. Using ELISpot assay, we showed that Batf3-  
633 dependent DCs are crucial for the generation of antitumor CD8<sup>+</sup> T cells in the spleens of mice  
634 after IT heat-iOV-GM treatment. By contrast, IT live OV-GM has limited potency to induce  
635 innate immunity at the non-injected distant tumors, which correlates with the lower levels of  
636 activated CD8<sup>+</sup> T cells in the non-injected tumors and spleens compared with those treated with  
637 IT heat-iOV-GM. Furthermore, depletion of CD8<sup>+</sup> T cells from the circulation and tumors  
638 abolished IT heat-iOV-GM-induced innate immunity in the non-injected tumors.

639

640 Batf3 is a transcription factor that is critical for the development of CD103<sup>+</sup>/CD8 $\alpha$ <sup>+</sup> lineage DCs,  
641 which play an important role in cross-presentation of viral and tumor antigens<sup>49,50</sup>. We were  
642 surprised by our finding that IT live OV-GM had no antitumor activities in the Batf3<sup>-/-</sup> mice,  
643 whereas IT heat-iOV-GM extended the median survival to 25 days in the Batf3<sup>-/-</sup> mice compared  
644 with 17 days in PBS-treated WT mice. These results suggest that: (i) viral-mediated oncolysis  
645 plays little role (if any) in the Batf3<sup>-/-</sup> mice, which lack CD103<sup>+</sup>/CD8 $\alpha$ <sup>+</sup> DCs; (ii) IT heat-iOV-  
646 GM is capable of inducing limited antitumor activity independent of CD103<sup>+</sup> DCs. This could be  
647 related to its ability to induce the production of type I IFN and proinflammatory cytokines and  
648 chemokines in other myeloid cells such as CD11b<sup>+</sup> DCs, plasmacytoid DCs, or tumor-associated  
649 macrophages, or inflammatory monocytes, as well as in infected tumors and stromal cells.  
650 Further studies to elucidate the contributions of other myeloid cells to heat-iOV-GM-induced  
651 antitumor immunity are warranted.

652

653 We observed that both IT live OV-GM and IT heat-iOV-GM are capable of generating long-  
654 lasting antitumor memory responses through an “in situ vaccination” effect, in which tumor  
655 antigens are presented by CD103<sup>+</sup> DCs to generate tumor-specific CD4<sup>+</sup> and CD8<sup>+</sup> T cells in the  
656 TDLNs; These cells then return to circulation, are recruited to non-injected distant tumors, or  
657 establish residence in secondary lymphoid organs such as the spleen or lymph nodes or in other  
658 tissues such as the skin or the lungs. IT heat-iOV-GM is more potent in inducing long-lasting  
659 memory responses compared with IT live OV-GM, as 77% of tumor-bearing mice successfully  
660 treated with IT heat-iOV-GM rejected tumor rechallenge through IV, whereas only 36% of

661 tumor-bearing mice successfully treated with IT live OV-GM rejected tumor rechallenge. This  
662 has important clinical implications because potential viral-based immunotherapy that generates  
663 stronger immunological memory will be more effective in preventing cancer recurrence and  
664 prolonging patient survival.

665

666 In this study, we found heat-iOV-GM performs better than live OV-GM when combined with  
667 anti-CTLA-4 antibody in a murine B16-F10 bilateral tumor implantation. The survival advantage  
668 of the heat-iOV-GM and anti-CTLA-4 antibody combination is largely due to better control of  
669 tumor growth of the non-injected tumors compared with Live-OV-GM plus anti-CTLA-4. This is  
670 consistent with the notion that IT heat-iOV-GM generates stronger innate immunity in the non-  
671 injected distant tumors compared with Live-OV-GM, which synergizes with systemic delivery of  
672 anti-CTLA-4 antibody. In addition, IT heat-iOV-GM plus anti-PD-L1 antibody is more effective  
673 in restraining tumor growth compared with IT live OV-GM plus anti-PD-L1 or IT heat-iOV-GM  
674 alone in a large established B16-F10 melanoma model. This is likely due to the induction of PD-  
675 L1 expression in heat-iOV-GM-infected tumor or immune cells, which can be counteracted by  
676 anti-PD-L1 antibody. Together with other published studies, our results support the use of  
677 combination therapy of IT immunogenic viruses with systemic delivery of ICB to potentiate  
678 antitumor effects in both injected and non-injected tumors<sup>16 39 51</sup>.

679

## 680 **Abbreviations**

681

682 **BMDC:** bone marrow-derived dendritic cell

683 **cDCs:** conventional dendritic cells

684 **CTLA-4:** cytotoxic T cell-associated antigen 4

685 **ELISpot:** Enzyme-linked ImmunoSpot

686 **FACS:** fluorescence-activated cell sorting

687 **GAPDH:** glyceraldehyde-3-phosphate dehydrogenase

688 **gpt:** xanthine-guanine phosphoribosyl transferase gene

689 **Heat-iOV-GM:** heat-inactivated OV-GM

690 **Heat-iMVA:** heat-inactivated MVA

691 **ICB:** immune checkpoint blockade



692 **IFN- $\gamma$** : interferon- $\gamma$   
693 **IT**: Intratumoral  
694 **IV**: Intravenous  
695 **mGM-CSF**: murine granulocyte-macrophage colony-stimulating factor  
696 **MPA**: Mycophenolic acid  
697 **MOI**: multiplicity of infection  
698 **MVA**: modified vaccinia virus Ankara  
699 **OVs**: oncolytic viruses  
700 **OV-GM**: E3L $\Delta$ 83N-TK<sup>-</sup>-mGM-CSF  
701 **OV**: E3L $\Delta$ 83N-TK<sup>-</sup>-vector  
702 **PD-1**: programmed cell death protein 1  
703 **Pfu**: plaque form unit  
704 **PsE/L**: synthetic early/late promoter  
705 **TDLN**: tumor draining lymph node  
706 **TK**: thymidine kinase  
707 **TME**: tumor microenvironment  
708 **T-VEC**: Talimogene Laherparepvec  
709 **WT**: wild type

## 710 **Declarations**

## 711 **Acknowledgements**

712 We thank Dr. Stewart Shuman for critical review of the manuscript. We thank Katharina Shaw  
713 for editing. E3L $\Delta$ 83N virus was kindly provided by Bertram Jacobs (Arizona State University).

714

## 715 **Funding**

716 This work was supported that the Society of Memorial Sloan Kettering (MSK) research grant  
717 (L.D.), MSK Technology Development Fund (L.D.), Parker Institute for Cancer Immunotherapy  
718 Career Development Award (L.D.). This work was supported in part by the Swim across  
719 America (J.D.W., T.M.), Ludwig Institute for Cancer Research (J.D.W., T.M.), National Cancer  
720 Institute grants R01 CA56821 (J.D.W). This research was also funded in part through the  
721 NIH/NCI Cancer Center Support Grant P30 CA008748.

722

### 723 **Availability of data and materials**

724 All data published in this report are available on reasonable request.

725

### 726 **Authors' contributions**

727 W.W. and L.D. designed and performed the experiments, analyzed the data, and prepared the  
728 manuscript. P.D. and S.L. performed the experiments, analyzed the data, and assisted in  
729 manuscript preparation. N.Y., Y.W., and R.A.G. assisted in some experiments and data  
730 interpretation. T.M., J.D.W. assisted in experimental design, data interpretation, and manuscript  
731 preparation.

732

### 733 **Competing Interests**

734 Memorial Sloan Kettering Cancer Center filed patent applications for the use of inactivated  
735 vaccinia as monotherapy or in combination with immune checkpoint blockade for solid tumors.  
736 L.D., P.D., W. W., T.M., and J.D.W. are authors on the patent, which has been licensed to  
737 IMVAQ Therapeutics. L.D. T.M., and J.D.W. are co-founders of IMVAQ Therapeutics and hold  
738 equities in IMVAQ Therapeutics. T.M. is a consultant of Immunos Therapeutics and Pfizer. He  
739 has research support from Bristol Myers Squibb; Surface Oncology; Kyn Therapeutics; Infinity  
740 Pharmaceuticals, Inc.; Peregrine Pharmaceuticals, Inc.; Adaptive Biotechnologies; Leap  
741 Therapeutics, Inc.; and Aprea. He has patents on applications related to work on oncolytic viral  
742 therapy, alpha virus-based vaccine, neoantigen modeling, CD40, GITR, OX40, PD-1, and  
743 CTLA-4. J.D.W. is a consultant for Adaptive Biotech, Advaxis, Am-gen, Apricity, Array  
744 BioPharma, Ascentage Pharma, Astellas, Bayer, Beigene, Bristol Myers Squibb, Celgene,  
745 Chugai, Elucida, Eli Lilly, F Star, Genentech, Imvaq, Janssen, Kleo Pharma, Linnaeus,  
746 MedImmune, Merck, Neon Therapeutics, Ono, Polaris Pharma, Polynoma, Psioxus, Puretech,  
747 Recepta, Trieza, Sellas Life Sciences, Seramatrix, Surface Oncology, and Syndax. Research  
748 support: Bristol Myers Squibb, Medimmune, Merck Pharmaceuticals, and Genentech. Equity:  
749 Potenza Therapeutics, Tizona Pharmaceuticals, Adaptive Biotechnologies, Elucida, Imvaq,  
750 Beigene, Trieza, and Linnaeus. Honorarium: Esanex. Patents: xenogeneic DNA vaccines,  
751 alphavirus replicon particles ex-expressing TRP2, MDSC assay, Newcastle disease viruses for  
752 cancer therapy, genomic signature to identify responders to ipilimumab in melanoma, engineered

753 vaccinia viruses for cancer immunotherapy, anti-CD40 agonist mono-clonal antibody (mAb)  
754 fused to monophosphoryl lipid A (MPL) for cancer therapy, CAR+ T cells targeting  
755 differentiation antigens as means to treat cancer, anti-PD-1 antibody, anti-CTLA-4 antibodies,  
756 and anti-GITR antibodies and methods of use thereof.

757

758 **Patient consent for publication**

759 N/A

760

761 **Ethics approval and consent to participate**

762 N/A

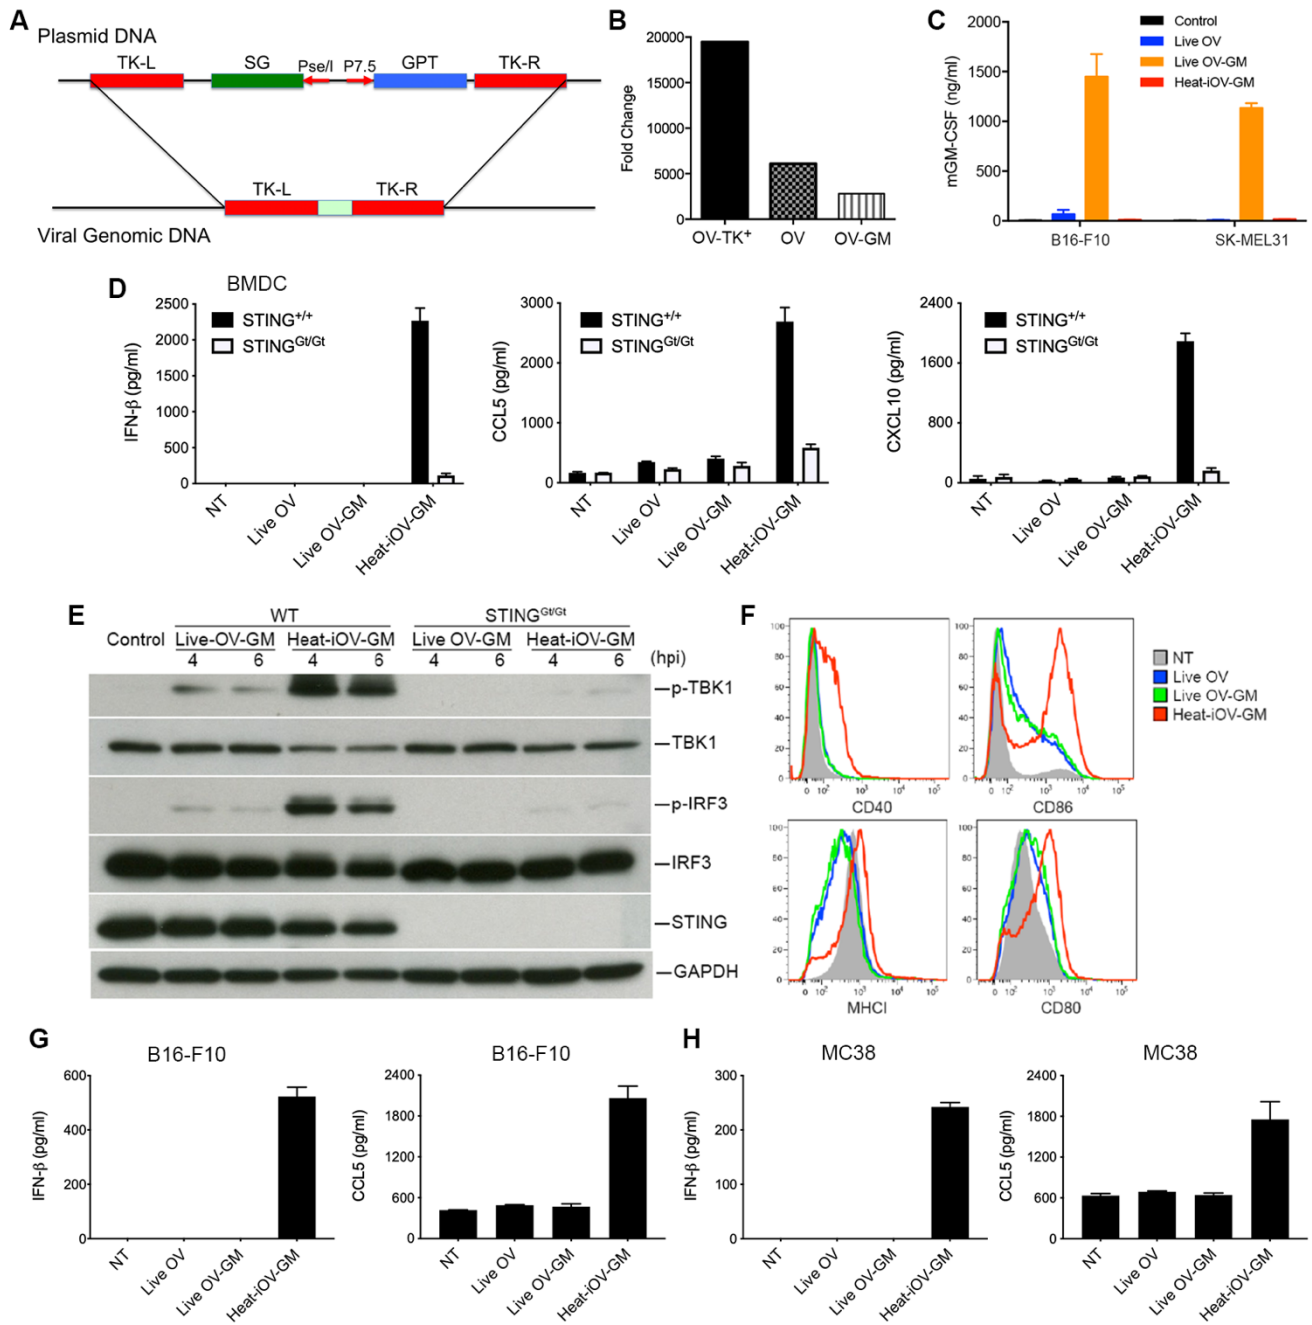

764 **Figure 1** Live oncolytic vaccinia virus fails to induce IFN- $\beta$ , and CCL5 from infected bone  
765 marrow derived dendritic cells (BMDCs), or B16-F10, or MC38 cell. (A) Schematic diagram of  
766 homologous recombination between pCB-mGM-CSF plasmid and E3L $\Delta$ 83N vaccinia viral DNA  
767 at the thymidine kinase (TK) locus to generate the recombinant virus E3L $\Delta$ 83N-TK<sup>-</sup> (OV) and  
768 E3L $\Delta$ 83N-TK<sup>-</sup>-mGM-CSF (OV-GM). mGM-CSF was expressed under the control of the  
769 vaccinia synthetic early and late promoter (PsE/L). (B) Fold changes of viral titers of  
770 recombinant viruses in murine B16-F10 melanoma cells at 72 h post infection compared with  
771 those at 1 h post infection. B16-F10 melanoma cells were infected with OV-TK<sup>+</sup>, OV, or OV-  
772 GM at a MOI of 0.01. Cells were collected at 1, 24, 48, and 72 h post infection and viral yields  
773 (log pfu) were determined by titration on BSC40 cells. (C) mGM-CSF expression of live OV-  
774 GM or heat-iOV-GM in B16-F10 or SK-MEL31 cells verified by ELISA. Supernatants were  
775 collected at 24 hours post infection. (D) BMDCs were infected with either live OV or live OV-  
776 GM at a MOI of 10, or with an equivalent amount of heat-iOV-GM. The supernatants were  
777 collected at 22 h post infection. The levels of secreted IFN- $\beta$ , CCL5 and CXCL10 in the  
778 supernatants were determined by ELISA. (E) Western blot analyses of BMDCs from WT or  
779 STING<sup>Gt/Gt</sup> mice infected with either live OV-GM at a MOI of 10 or with an equivalent amount  
780 of heat-iOV-GM. The levels of p-TBK1, TBK1, p-IRF3, IRF3, and STING are shown. GAPDH  
781 was used as a loading control. hpi: hours post-infection. (F) The expression levels of DC surface  
782 markers, MHCI, CD40, CD86, and CD80, on BMDCs infected with either live OV, live OV-  
783 GM, or heat-iOV-GM as determined by FACS. NT: no treatment control. (G) The concentrations  
784 of secreted IFN- $\beta$  and CCL5 in the supernatants of murine B16-F10 melanoma cells infected  
785 with either live OV or live OV-GM at a MOI of 10, or with an equivalent amount of heat-iOV-  
786 GM. (H) The concentrations of secreted IFN- $\beta$  and CCL5 in the supernatants of murine MC38  
787 colon adenocarcinoma cells infected with either live OV, live OV-GM, or heat-iOV-GM.  
788  
789

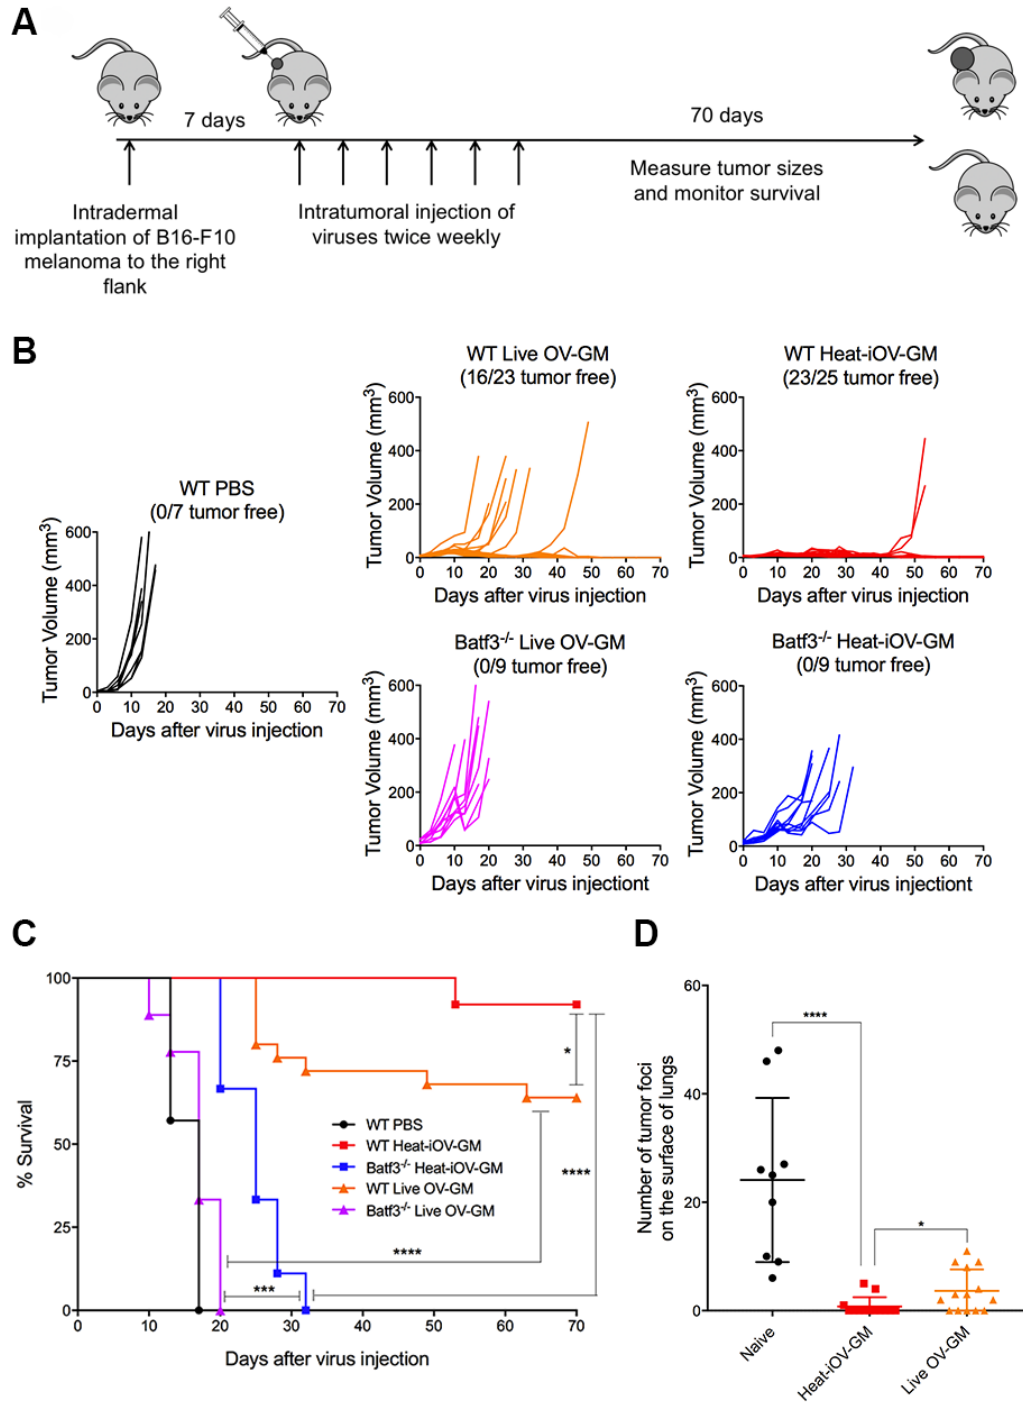

790 **Figure 2** Batf3-dependent CD103+ dendritic cells played an important role in anti-tumor effects  
791 of IT live OV-GM and heat-iOV-GM. (A) Tumor implantation and treatment plan in a unilateral  
792 B16-F10 intradermal implantation tumor model. (B) Tumor volumes of injected tumors in WT  
793 mice treated with either live OV-GM (n=23), heat-iOV-GM (n=25), or PBS control (n=7) or  
794 Batf3<sup>-/-</sup> mice treated with live OV-GM (n=9) or heat-iOV-GM (n=9) over days post treatment.  
795 (C) Kaplan-Meier survival curve of WT and Batf3<sup>-/-</sup> mice treated with PBS, live OV-GM, or  
796 heat-iOV-GM. (\*P < 0.05; \*\*\*P < 0.001; \*\*\*\*P < 0.0001). (D) The number of tumor foci on the  
797 surface of lungs collected at 3 weeks from either naïve (n=9), or heat-iOV-GM-treated (n=13), or  
798 live OV-GM-treated mice (n=14) after intravenous delivery of 1 x 10<sup>5</sup> B16-F10 cells (\*P < 0.05;  
799 \*\*\*\*P < 0.0001, t test).

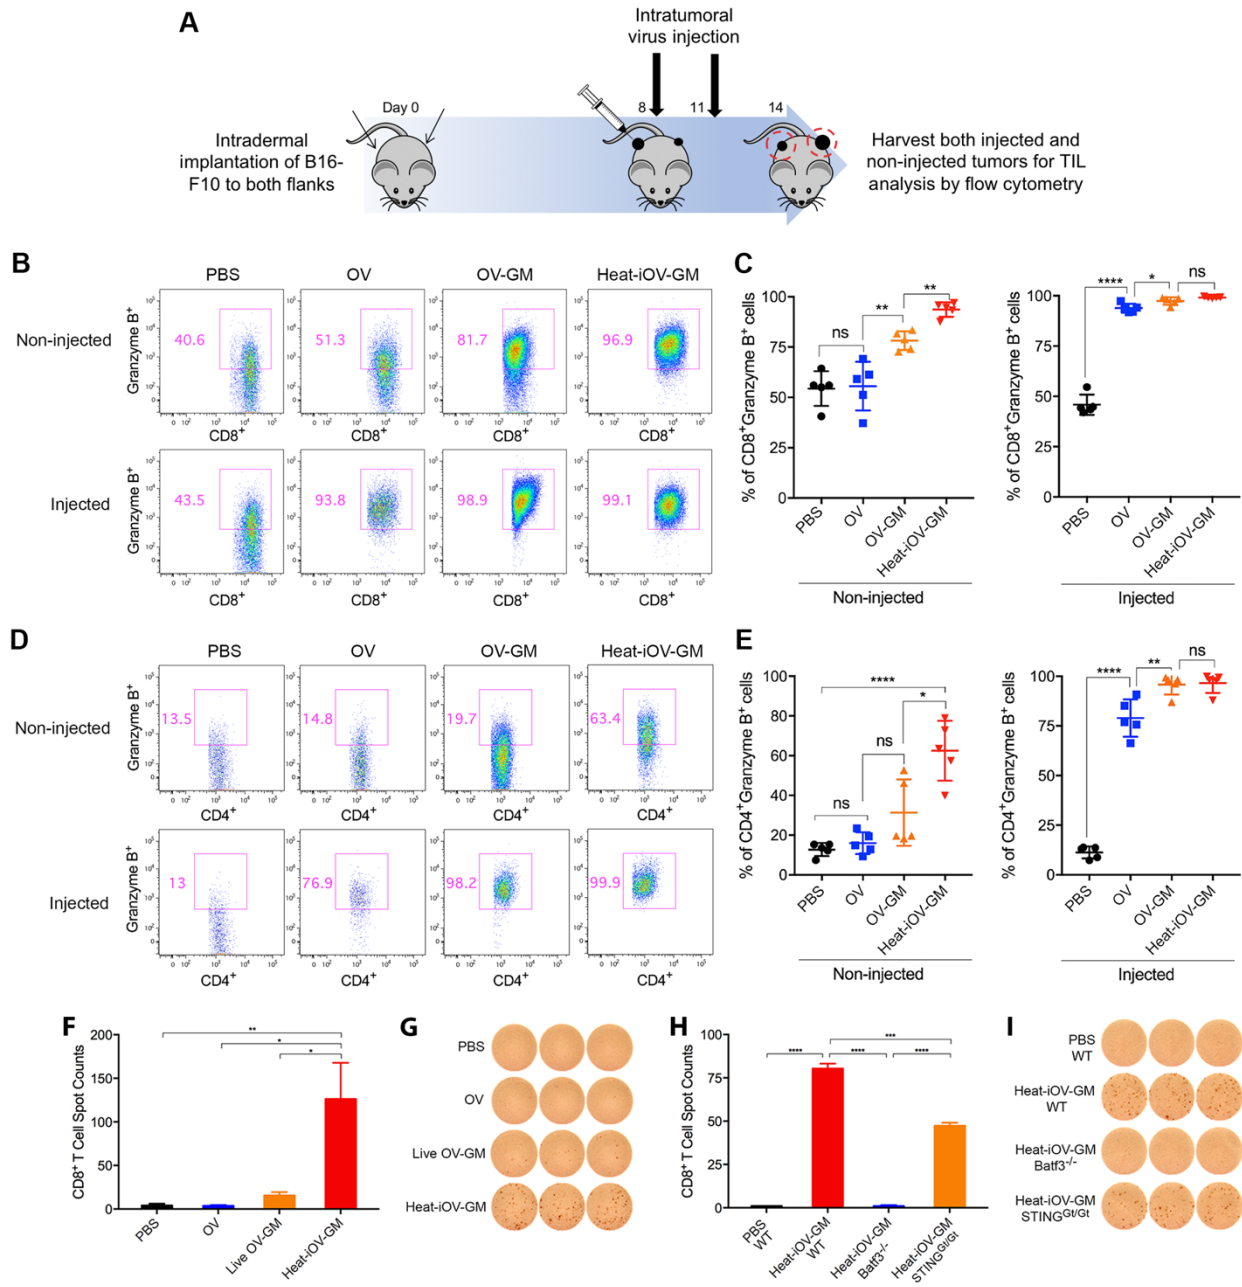



800 **Figure 3** Intratumoral injection of heat-iOV-GM induces higher levels of activated CD8<sup>+</sup> and  
801 CD4<sup>+</sup> T cells in the non-injected distant tumors. (A) B16-F10 melanoma cells were intradermal  
802 implanted to the left and right flanks of mice (2.5 x 10<sup>5</sup> and 5 x 10<sup>5</sup> cells, respectively). PBS, OV,  
803 live OV-GM, or heat-iOV-GM (2 x 10<sup>7</sup> pfu) were injected IT into the right-side tumors on day 8  
804 and 11 after tumor implantation. Tumors were harvested 3 days post last virus injection and were  
805 used for analyzing the immune cell infiltration by FACS. (B) Representative flow cytometry plot  
806 of CD8<sup>+</sup> T cells expressing Granzyme B in the non-injected or injected tumors from mice treated  
807 with PBS, OV, live OV-GM, or heat-iOV-GM. (C) Percentages of CD8<sup>+</sup> T cells expressing  
808 Granzyme B within non-injected and injected tumors. (D) Representative flow cytometry plot of  
809 CD4<sup>+</sup> T cells expressing Granzyme B in the non-injected and injected tumors from mice treated  
810 with PBS, OV, live OV-GM, or heat-iOV-GM. (E) Percentages of CD4<sup>+</sup> T cells expressing  
811 Granzyme B within non-injected and injected tumors (n=5, \**P* < 0.05; \*\**P* < 0.01; \*\*\**P* < 0.001;  
812 \*\*\*\**P* < 0.0001) (F-I) CD8<sup>+</sup> T cells from splenocytes of mice treated with different viruses were  
813 analyzed for anti-tumor interferon- $\gamma$  (IFN- $\gamma$ ) activities using ELISPOT assay. (F) IFN- $\gamma$ <sup>+</sup> spots per  
814 250,000 purified CD8<sup>+</sup> T cells from the spleens of the mice treated with IT PBS, OV, live OV-  
815 GM, or heat-iOV-GM (n=5, \**P* < 0.05; \*\**P* < 0.01). (G) Representative images from an ELISPOT  
816 assay from F. (H) IFN- $\gamma$ <sup>+</sup> spots per 250,000 purified CD8<sup>+</sup> T cells from WT, Batf3<sup>-/-</sup>, or STING<sup>Gt/Gt</sup>  
817 mice treated with IT heat-iOV-GM. (I) ELISPOT images from pooled CD8<sup>+</sup> T cells of WT, Batf3<sup>-</sup>  
818 <sup>-/-</sup>, or STING<sup>Gt/Gt</sup> mice treated with IT heat-iOV-GM from H. (n=3, \**P* < 0.05; \*\**P* < 0.01; \*\*\**P* <  
819 0.001; \*\*\*\**P* < 0.0001).

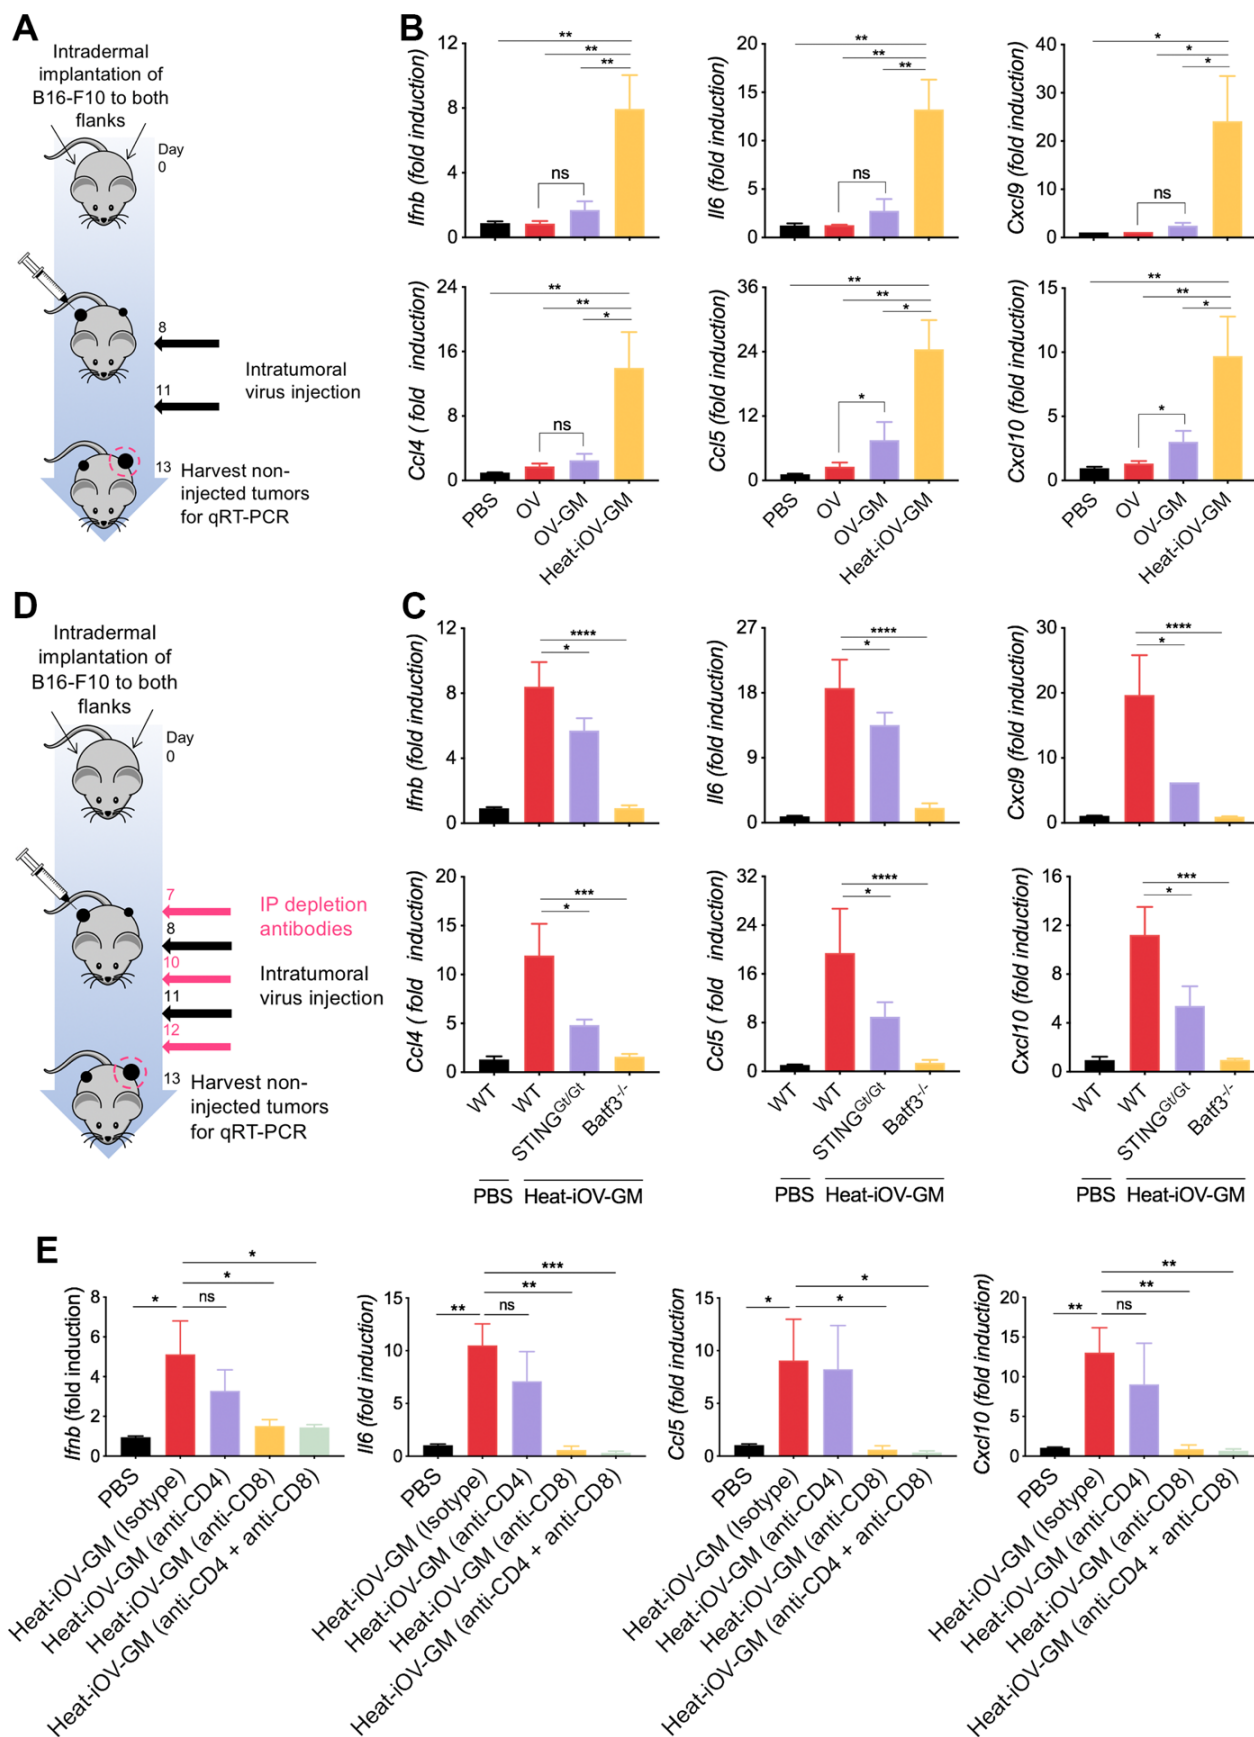

820 **Figure 4** IT heat-iOV-GM induces higher levels of IFN and proinflammatory cytokines and  
821 chemokines in distant non-injected tumors than live OV-GM. (A) Tumor implantation and  
822 treatment schedule in a bilateral intradermal tumor implantation model. (B) B16-F10 melanoma  
823 cells were implanted intradermally on the left and right flanks of C57BL/6J mice. After the tumors  
824 are established, the larger tumors on the right flank were injected with either PBS, live OV, live  
825 OV-GM, or heat-iOV-GM twice weekly. The non-injected tumors were harvested 2 days after the  
826 second injection and RNAs were extracted. Quantitative real-time PCR analyses of *Ifnb*, *Il6*, *Ccl4*,  
827 *Ccl5*, *Cxcl9*, and *Cxcl10* gene expression in non-injected B16-F10 tumors isolated from mice  
828 treated with either PBS, OV, live OV-GM, or heat-iOV-GM (n=4-5, \* $P < 0.05$ , \*\* $P < 0.01$ , *t* test).  
829 (C) The expression of IFN, proinflammatory cytokines and chemokines in non-injected B16-F10  
830 tumors from WT, *Batf3*<sup>-/-</sup>, or *STING*<sup>Gt/Gt</sup> mice treated with heat-iOV-GM were analyzed. Relative  
831 expression of *Ifnb*, *Il6*, *Ccl4*, *Ccl5*, *Cxcl9*, and *Cxcl10* genes was measured by quantitative real-  
832 time RT-PCR and was normalized to the expression of GAPDH. Each panel shows the fold  
833 changes of the mRNA levels in non-injected tumors from WT, *Batf3*<sup>-/-</sup>, or *STING*<sup>Gt/Gt</sup> mice treated  
834 with heat-iOV-GM, compared with those from WT mice treated with PBS (n=4, \* $P < 0.05$ ; \*\* $P <$   
835  $0.01$ ; \*\*\* $P < 0.001$ ; \*\*\*\* $P < 0.0001$ ). (D) Schematic diagram of a bilateral intradermal tumor  
836 implantation model with CD4 and/or CD8 depletion. (E) Relative expression level of IFN,  
837 proinflammatory cytokines and chemokines in non-injected tumors from each treatment groups  
838 were measured by quantitative real-time RT-PCR and was normalized to the expression of  
839 GAPDH (n=4, \* $P < 0.05$ ; \*\* $P < 0.01$ ; \*\*\* $P < 0.001$ ; \*\*\*\* $P < 0.0001$ ).

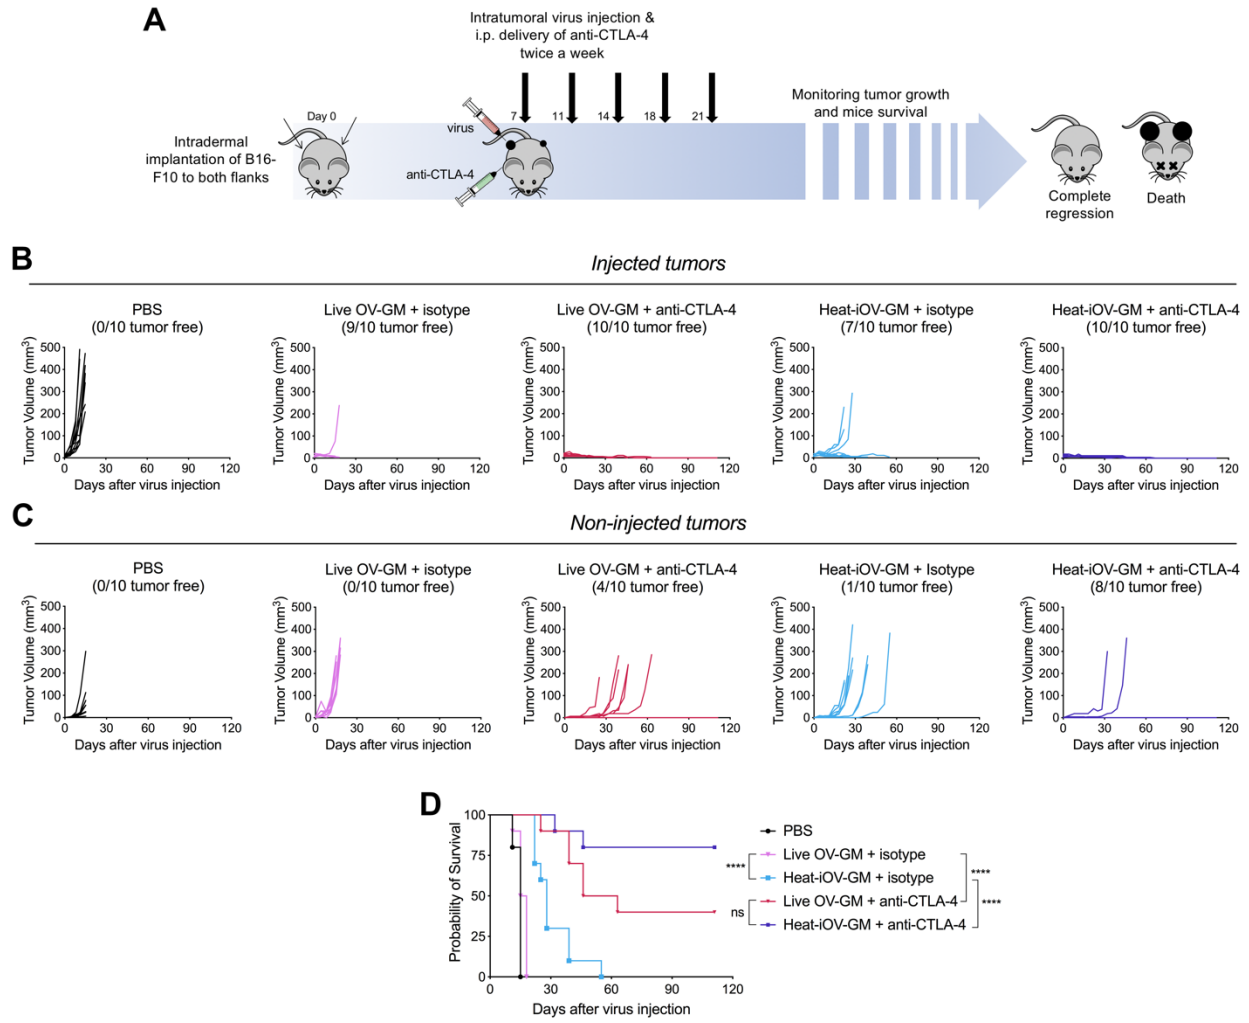

840

841 **Figure 5** Combination with checkpoint blockade further enhances the abscopal anti-tumor effect  
842 induced by heat-iOV-GM. (A) WT C57BL/6J mice were intradermally implanted with B16-F10  
843 tumors on both left and right flanks. Starting from day 7 post implantation, tumor-bearing mice  
844 were treated twice weekly with intratumoral injection of live OV-GM or heat-iOV-GM in  
845 combination of intraperitoneally injection of isotype control or anti-CTLA-4 (n=10 for all  
846 groups). PBS was used as a control. Tumor volume and mice survival were monitored  
847 throughout the course of study. (B) Tumor volumes of injected tumors over days of treatment.  
848 (C) Tumor volumes of non-injected tumors over days of treatment. (D) Kaplan-Meier survival  
849 curve of WT mice treated with PBS, live OV-GM or heat-iOV-GM with or without anti-CTLA-4  
850 (\*P < 0.05; \*\*\*P < 0.001; \*\*\*\*P < 0.0001).

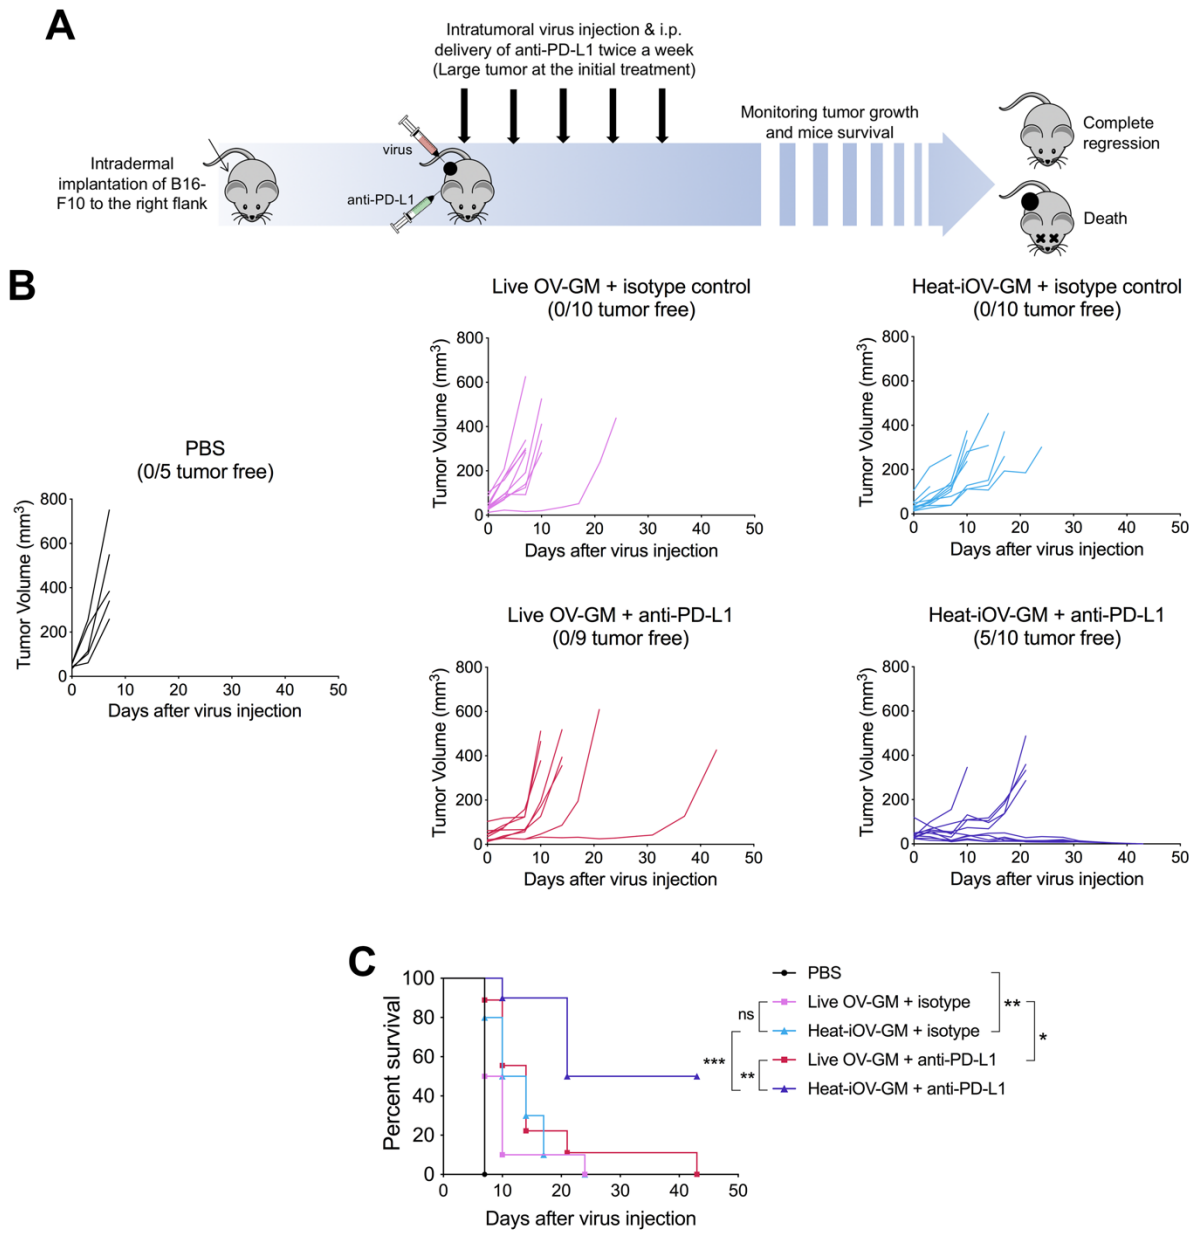

852 **Figure 6** Mice treated with heat-iOV-GM and checkpoint blockade combination therapy show  
853 delayed tumor growth and higher survival rate in large tumor model. (A) WT C57BL/6J mice  
854 were intradermally implanted with B16-F10 melanoma cells on the right flank. When tumor size  
855 reaches 5 mm in diameter, intratumoral injection of live OV-GM or heat-iOV-GM combined  
856 with intraperitoneal delivery of anti-PD-L1 or isotype control was initiated and continued twice a  
857 week. PBS was used as a control. Tumor growth and mice survival were monitored throughout  
858 the course of study. (B) Tumor volumes of injected tumors over days of treatment. (C) Kaplan-  
859 Meier survival curve of WT mice treated with PBS, live OV-GM or heat-iOV-GM with or  
860 without anti-PD-L1 (n=9 or 10; \*P < 0.05; \*\*\*P < 0.001; \*\*\*\*P < 0.0001).

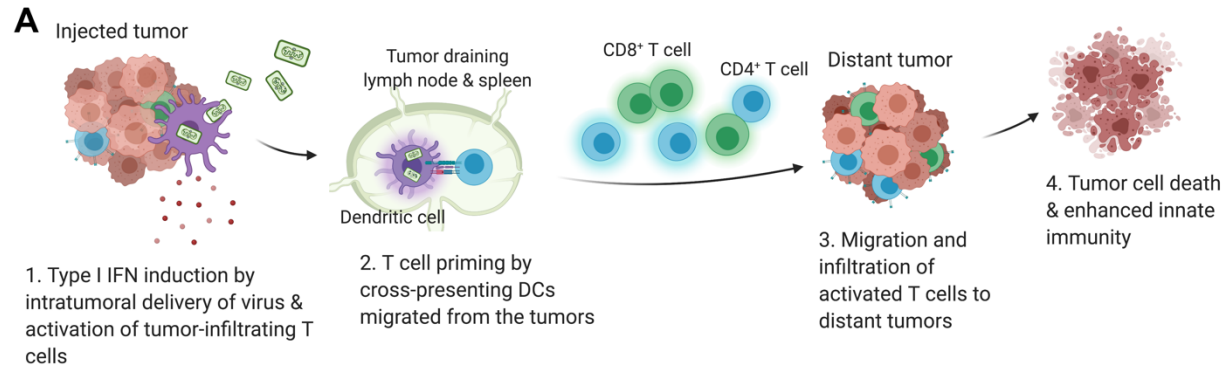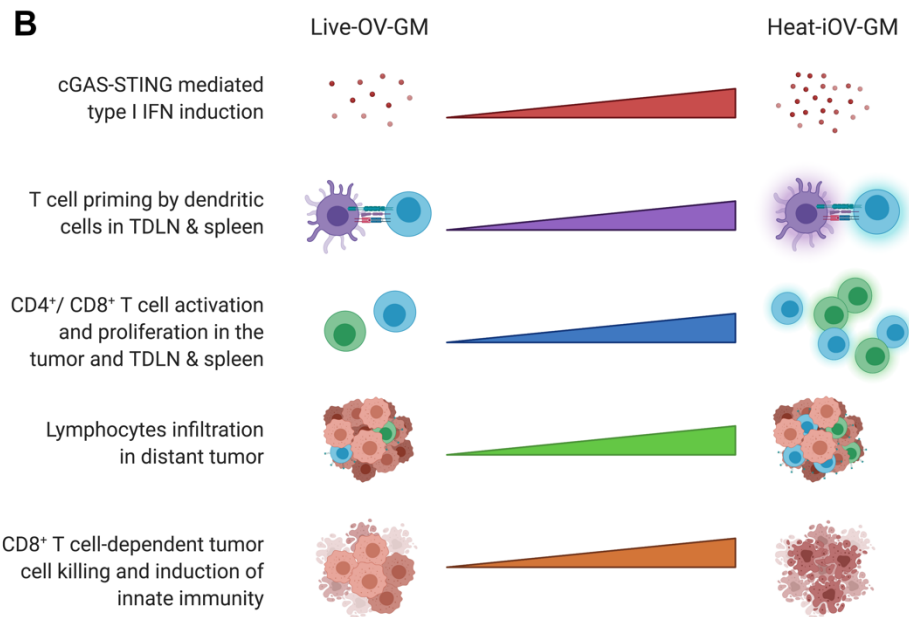



861 **Figure 7** Working model of heat-iOV-GM as a stronger inducer of anti-tumor innate immunity  
862 especially in distant tumor compared with live OV-GM. (A) Schematic of induction of innate  
863 immunity by intratumoral delivery of heat-iOV-GM vs. live OV-GM in both injected and non-  
864 injected distant tumors; created with biorender.com. (B) Comparison of immune activation by  
865 heat-iOV-GM vs. live OV-GM. IT delivery of heat-iOV-GM induces (i) higher levels of type I  
866 IFN than live OV-GM due to activation of the cGAS/STING-mediated cytosolic DNA-sensing  
867 pathway; (ii) stronger T cell priming in TDLN and spleen; and (iii) more activated T cells, which  
868 then migrate to the distant tumors resulting in enhanced abscopal tumor cell killing and  
869 eventually tumor regression through the induction of a stronger innate immunity.

870 **Reference:**

- 871 1. Russell SJ, Barber GN. Oncolytic Viruses as Antigen-Agnostic Cancer Vaccines. *Cancer Cell* 2018;33(4):599-  
872 605. doi: 10.1016/j.ccell.2018.03.011 [published Online First: 2018/04/11]
- 873 2. Bommareddy PK, Shettigar M, Kaufman HL. Integrating oncolytic viruses in combination cancer  
874 immunotherapy. *Nat Rev Immunol* 2018;18(8):498-513. doi: 10.1038/s41577-018-0014-6 [published  
875 Online First: 2018/05/11]
- 876 3. Zamarin D, Wolchok JD. Potentiation of immunomodulatory antibody therapy with oncolytic viruses for  
877 treatment of cancer. *Mol Ther Oncolytics* 2014;1:14004. doi: 10.1038/mto.2014.4 [published Online First:  
878 2014/01/01]
- 879 4. Liu BL, Robinson M, Han ZQ, et al. ICP34.5 deleted herpes simplex virus with enhanced oncolytic, immune  
880 stimulating, and anti-tumour properties. *Gene therapy* 2003;10(4):292-303. doi: 10.1038/sj.gt.3301885
- 881 5. Andtbacka RH, Kaufman HL, Collichio F, et al. Talimogene Laherparepvec Improves Durable Response Rate in  
882 Patients With Advanced Melanoma. *J Clin Oncol* 2015;33(25):2780-8. doi: 10.1200/JCO.2014.58.3377
- 883 6. Harrington KJ, Andtbacka RH, Collichio F, et al. Efficacy and safety of talimogene laherparepvec versus  
884 granulocyte-macrophage colony-stimulating factor in patients with stage IIIB/C and IVM1a melanoma:  
885 subanalysis of the Phase III OPTiM trial. *Onco Targets Ther* 2016;9:7081-93. doi: 10.2147/OTT.S115245
- 886 7. Puzanov I, Milhem MM, Minor D, et al. Talimogene Laherparepvec in Combination With Ipilimumab in  
887 Previously Untreated, Unresectable Stage IIIB-IV Melanoma. *J Clin Oncol* 2016;34(22):2619-26. doi:  
888 10.1200/JCO.2016.67.1529
- 889 8. Chesney J, Puzanov I, Collichio F, et al. Randomized, Open-Label Phase II Study Evaluating the Efficacy and  
890 Safety of Talimogene Laherparepvec in Combination With Ipilimumab Versus Ipilimumab Alone in  
891 Patients With Advanced, Unresectable Melanoma. *J Clin Oncol* 2017;JCO2017737379. doi:  
892 10.1200/JCO.2017.73.7379
- 893 9. Ribas A, Dummer R, Puzanov I, et al. Oncolytic Virotherapy Promotes Intratumoral T Cell Infiltration and  
894 Improves Anti-PD-1 Immunotherapy. *Cell* 2017;170(6):1109-19 e10. doi: 10.1016/j.cell.2017.08.027
- 895 10. Moss B. Poxviridae: The viruses and their replication. : Lippincott Williams & Wilkins 2007.
- 896 11. Park BH, Hwang T, Liu TC, et al. Use of a targeted oncolytic poxvirus, JX-594, in patients with refractory  
897 primary or metastatic liver cancer: a phase I trial. *Lancet Oncol* 2008;9(6):533-42. doi: S1470-  
898 2045(08)70107-4 [pii]  
899 10.1016/S1470-2045(08)70107-4 [published Online First: 2008/05/23]
- 900 12. Liu TC, Hwang T, Park BH, et al. The targeted oncolytic poxvirus JX-594 demonstrates antitumoral,  
901 antivascular, and anti-HBV activities in patients with hepatocellular carcinoma. *Mol Ther* 2008;16(9):1637-  
902 42. doi: mt2008143 [pii]  
903 10.1038/mt.2008.143 [published Online First: 2008/07/17]
- 904 13. Breitbach CJ, Burke J, Jonker D, et al. Intravenous delivery of a multi-mechanistic cancer-targeted oncolytic  
905 poxvirus in humans. *Nature* 2011;477(7362):99-102. doi: 10.1038/nature10358  
906 nature10358 [pii] [published Online First: 2011/09/03]
- 907 14. Parato KA, Breitbach CJ, Le Boeuf F, et al. The oncolytic poxvirus JX-594 selectively replicates in and destroys  
908 cancer cells driven by genetic pathways commonly activated in cancers. *Mol Ther* 2012;20(4):749-58. doi:  
909 10.1038/mt.2011.276 [published Online First: 2011/12/22]
- 910 15. Heo J, Reid T, Ruo L, et al. Randomized dose-finding clinical trial of oncolytic immunotherapeutic vaccinia JX-  
911 594 in liver cancer. *Nat Med* 2013;19(3):329-36. doi: 10.1038/nm.3089 [published Online First:  
912 2013/02/12]
- 913 16. Zamarin D, Holmgaard RB, Subudhi SK, et al. Localized oncolytic virotherapy overcomes systemic tumor  
914 resistance to immune checkpoint blockade immunotherapy. *Sci Transl Med* 2014;6(226):226ra32. doi:  
915 10.1126/scitranslmed.3008095 [published Online First: 2014/03/07]
- 916 17. Bell J, McFadden G. Viruses for tumor therapy. *Cell host & microbe* 2014;15(3):260-5. doi:  
917 10.1016/j.chom.2014.01.002
- 918 18. Kaufman HL, Kohlhapp FJ, Zloza A. Oncolytic viruses: a new class of immunotherapy drugs. *Nat Rev Drug*  
919 *Discov* 2015;14(9):642-62. doi: 10.1038/nrd4663
- 920 19. Lemay CG, Keller BA, Edge RE, et al. Oncolytic Viruses: The Best is Yet to Come. *Curr Cancer Drug Targets*  
921 2017 doi: 10.2174/1568009617666170206111609
- 922 20. Davola ME, Mossman KL. Oncolytic viruses: how "lytic" must they be for therapeutic efficacy?  
923 *Oncoimmunology* 2019;8(6):e1581528. doi: 10.1080/2162402X.2019.1596006 [published Online First:  
924 2019/05/10]

- 925 21. Sutter G, Staib C. Vaccinia vectors as candidate vaccines: the development of modified vaccinia virus Ankara  
926 for antigen delivery. *Current drug targets Infectious disorders* 2003;3(3):263-71. [published Online First:  
927 2003/10/08]
- 928 22. McCurdy LH, Larkin BD, Martin JE, et al. Modified vaccinia Ankara: potential as an alternative smallpox  
929 vaccine. *Clin Infect Dis* 2004;38(12):1749-53. doi: 10.1086/421266 [published Online First: 2004/07/01]
- 930 23. Vollmar J, Arndtz N, Eckl KM, et al. Safety and immunogenicity of IMVAMUNE, a promising candidate as a  
931 third generation smallpox vaccine. *Vaccine* 2006;24(12):2065-70. doi: S0264-410X(05)01165-5 [pii]  
932 10.1016/j.vaccine.2005.11.022 [published Online First: 2005/12/13]
- 933 24. Gomez CE, Najera JL, Krupa M, et al. The poxvirus vectors MVA and NYVAC as gene delivery systems for  
934 vaccination against infectious diseases and cancer. *Curr Gene Ther* 2008;8(2):97-120. [published Online  
935 First: 2008/04/09]
- 936 25. Goepfert PA, Elizaga ML, Sato A, et al. Phase 1 safety and immunogenicity testing of DNA and recombinant  
937 modified vaccinia Ankara vaccines expressing HIV-1 virus-like particles. *J Infect Dis* 2011;203(5):610-9.  
938 doi: jiq105 [pii]  
939 10.1093/infdis/jiq105 [published Online First: 2011/02/02]
- 940 26. Gomez CE, Najera JL, Krupa M, et al. MVA and NYVAC as vaccines against emergent infectious diseases and  
941 cancer. *Curr Gene Ther* 2011;11(3):189-217. [published Online First: 2011/04/02]
- 942 27. Dai P, Wang W, Cao H, et al. Modified vaccinia virus Ankara triggers type I IFN production in murine  
943 conventional dendritic cells via a cGAS/STING-mediated cytosolic DNA-sensing pathway. *PLoS Pathog*  
944 2014;10(4):e1003989. doi: 10.1371/journal.ppat.1003989 [published Online First: 2014/04/20]
- 945 28. Ishikawa H, Ma Z, Barber GN. STING regulates intracellular DNA-mediated, type I interferon-dependent innate  
946 immunity. *Nature* 2009;461(7265):788-92. doi: nature08476 [pii]  
947 10.1038/nature08476 [published Online First: 2009/09/25]
- 948 29. Sun L, Wu J, Du F, et al. Cyclic GMP-AMP synthase is a cytosolic DNA sensor that activates the type I  
949 interferon pathway. *Science* 2013;339(6121):786-91. doi: 10.1126/science.1232458 [published Online  
950 First: 2012/12/22]
- 951 30. Wu J, Sun L, Chen X, et al. Cyclic GMP-AMP is an endogenous second messenger in innate immune signaling  
952 by cytosolic DNA. *Science* 2013;339(6121):826-30. doi: 10.1126/science.1229963 [published Online First:  
953 2012/12/22]
- 954 31. Li X, Shu C, Yi G, et al. Cyclic GMP-AMP synthase is activated by double-stranded DNA-induced  
955 oligomerization. *Immunity* 2013;39(6):1019-31. doi: 10.1016/j.immuni.2013.10.019 [published Online  
956 First: 2013/12/18]
- 957 32. Gao P, Ascano M, Wu Y, et al. Cyclic [G(2',5')pA(3',5')p] is the metazoan second messenger produced by DNA-  
958 activated cyclic GMP-AMP synthase. *Cell* 2013;153(5):1094-107. doi: 10.1016/j.cell.2013.04.046  
959 [published Online First: 2013/05/08]
- 960 33. Gao P, Ascano M, Zillinger T, et al. Structure-function analysis of STING activation by c[G(2',5')pA(3',5')p] and  
961 targeting by antiviral DMXAA. *Cell* 2013;154(4):748-62. doi: 10.1016/j.cell.2013.07.023 [published  
962 Online First: 2013/08/06]
- 963 34. Civril F, Deimling T, de Oliveira Mann CC, et al. Structural mechanism of cytosolic DNA sensing by cGAS.  
964 *Nature* 2013;498(7454):332-7. doi: 10.1038/nature12305 [published Online First: 2013/06/01]
- 965 35. Ablasser A, Goldeck M, Cavlar T, et al. cGAS produces a 2'-5'-linked cyclic dinucleotide second messenger that  
966 activates STING. *Nature* 2013;498(7454):380-4. doi: 10.1038/nature12306 [published Online First:  
967 2013/06/01]
- 968 36. Diner EJ, Burdette DL, Wilson SC, et al. The innate immune DNA sensor cGAS produces a noncanonical cyclic  
969 dinucleotide that activates human STING. *Cell reports* 2013;3(5):1355-61. doi:  
970 10.1016/j.celrep.2013.05.009 [published Online First: 2013/05/28]
- 971 37. Woo SR, Fuertes MB, Corrales L, et al. STING-dependent cytosolic DNA sensing mediates innate immune  
972 recognition of immunogenic tumors. *Immunity* 2014;41(5):830-42. doi: 10.1016/j.immuni.2014.10.017
- 973 38. Deng L, Liang H, Xu M, et al. STING-Dependent Cytosolic DNA Sensing Promotes Radiation-Induced Type I  
974 Interferon-Dependent Antitumor Immunity in Immunogenic Tumors. *Immunity* 2014;41(5):843-52. doi:  
975 10.1016/j.immuni.2014.10.019
- 976 39. Dai P, Wang W, Yang N, et al. Intratumoral delivery of inactivated modified vaccinia virus Ankara (iMVA)  
977 induces systemic antitumor immunity via STING and Batf3-dependent dendritic cells. *Sci Immunol*  
978 2017;2(11) doi: 10.1126/sciimmunol.aal1713 [published Online First: 2017/08/02]

- 979 40. Brandt TA, Jacobs BL. Both carboxy- and amino-terminal domains of the vaccinia virus interferon resistance  
980 gene, E3L, are required for pathogenesis in a mouse model. *J Virol* 2001;75(2):850-6. doi:  
981 10.1128/JVI.75.2.850-856.2001 [published Online First: 2001/01/03]
- 982 41. Buller RM, Chakrabarti S, Cooper JA, et al. Deletion of the vaccinia virus growth factor gene reduces virus  
983 virulence. *J Virol* 1988;62(3):866-74. [published Online First: 1988/03/01]
- 984 42. Puhlmann M, Brown CK, Gnant M, et al. Vaccinia as a vector for tumor-directed gene therapy: biodistribution  
985 of a thymidine kinase-deleted mutant. *Cancer Gene Ther* 2000;7(1):66-73. doi: 10.1038/sj.cgt.7700075
- 986 43. Dunn GP, Bruce AT, Sheehan KC, et al. A critical function for type I interferons in cancer immunoediting. *Nat*  
987 *Immunol* 2005;6(7):722-9. doi: 10.1038/ni1213
- 988 44. Fuertes MB, Kacha AK, Kline J, et al. Host type I IFN signals are required for antitumor CD8<sup>+</sup> T cell responses  
989 through CD8 $\alpha$ <sup>+</sup> dendritic cells. *J Exp Med* 2011;208(10):2005-16. doi: 10.1084/jem.20101159  
990 [published Online First: 2011/09/21]
- 991 45. Diamond MS, Kinder M, Matsushita H, et al. Type I interferon is selectively required by dendritic cells for  
992 immune rejection of tumors. *J Exp Med* 2011;208(10):1989-2003. doi: 10.1084/jem.20101158 [published  
993 Online First: 2011/09/21]
- 994 46. Broz ML, Binnewies M, Boldajipour B, et al. Dissecting the tumor myeloid compartment reveals rare activating  
995 antigen-presenting cells critical for T cell immunity. *Cancer Cell* 2014;26(5):638-52. doi:  
996 10.1016/j.ccell.2014.09.007
- 997 47. Spranger S, Dai D, Horton B, et al. Tumor-Residing Batf3 Dendritic Cells Are Required for Effector T Cell  
998 Trafficking and Adoptive T Cell Therapy. *Cancer Cell* 2017;31(5):711-23 e4. doi:  
999 10.1016/j.ccell.2017.04.003
- 1000 48. Cao H, Dai P, Wang W, et al. Innate immune response of human plasmacytoid dendritic cells to poxvirus  
1001 infection is subverted by vaccinia E3 via its Z-DNA/RNA binding domain. *PLoS One* 2012;7(5):e36823.  
1002 doi: 10.1371/journal.pone.0036823 [published Online First: 2012/05/19]
- 1003 49. Hildner K, Edelson BT, Purtha WE, et al. Batf3 deficiency reveals a critical role for CD8 $\alpha$ <sup>+</sup> dendritic cells  
1004 in cytotoxic T cell immunity. *Science* 2008;322(5904):1097-100. doi: 10.1126/science.1164206 [published  
1005 Online First: 2008/11/15]
- 1006 50. Edelson BT, Kc W, Juang R, et al. Peripheral CD103<sup>+</sup> dendritic cells form a unified subset developmentally  
1007 related to CD8 $\alpha$ <sup>+</sup> conventional dendritic cells. *J Exp Med* 2010;207(4):823-36. doi:  
1008 10.1084/jem.20091627 [published Online First: 2010/03/31]
- 1009 51. Zamarin D, Ricca JM, Sadekova S, et al. PD-L1 in tumor microenvironment mediates resistance to oncolytic  
1010 immunotherapy. *J Clin Invest* 2018;128(4):1413-28. doi: 10.1172/JCI98047 [published Online First:  
1011 2018/03/06]

## Supplementary Information

### Elucidating Mechanisms of Antitumor Immunity Mediated by Live Oncolytic Vaccinia and Heat-Inactivated Vaccinia

Weiyi Wang<sup>1#</sup>, Peihong Dai<sup>1#</sup>, Shuaitong Liu<sup>1#</sup>, Ning Yang<sup>1</sup>, Yi Wang<sup>1</sup>, Rachel A. Giese<sup>2</sup>, Taha Merghoub<sup>2,3,4</sup>, Jedd D. Wolchok<sup>2,3,4</sup>, and Liang Deng<sup>1,3,4\*</sup>

<sup>1</sup> Dermatology Service, Department of Medicine, Memorial Sloan Kettering Cancer Center, New York, NY, USA

<sup>2</sup>Human Oncology and Pathogenesis Program; Memorial Sloan Kettering Cancer Center, New York, NY 10065, USA

<sup>3</sup>Parker Institute for Cancer Immunotherapy, Memorial Sloan Kettering Cancer Center, New York, NY, USA

<sup>4</sup>Weill Cornell Medical College, New York, NY, USA

\*corresponding author. Mailing address for Liang Deng: Dermatology Service, Department of Medicine, Memorial Sloan Kettering Cancer Center, 1275 York Ave., New York, NY 10065. Email: [dengl@mskcc.org](mailto:dengl@mskcc.org). # These three authors contributed equally to this work.

This file contains:

- Supplementary Fig. 1
- Supplementary Fig. 2
- Supplementary Fig. 3
- Supplementary Fig. 4
- Supplementary Fig. 5

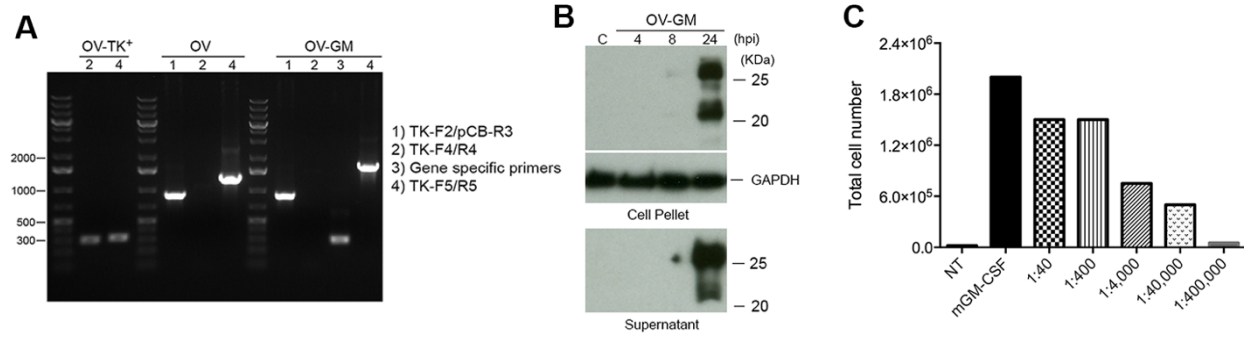

**Figure S1** Expression of GM-CSF by B16-F10 cells infected with live OV-GM. (A) PCR verification of recombinant OV and OV-GM. (B) Western blot analysis of mGM-CSF expression in OV-GM-infected murine B16-F10 cells. mGM-CSF protein was detected in both the cell pellet and the culture supernatant. (C) Bioactivity of secreted mGM-CSF protein produced by B16-F10 cells infected with OV-GM. Bone marrow cells ( $2.5 \times 10^5$ ) from C57BL/6J mice were cultured in the presence of recombinant GM-CSF at 20 ng/ml or with serial dilutions of supernatants from OV-GM-infected B16-F10 melanoma cells for 7 days, and they were subjected to flow cytometry analysis. The total numbers of CD11c<sup>+</sup> DCs in various culture conditions are shown.

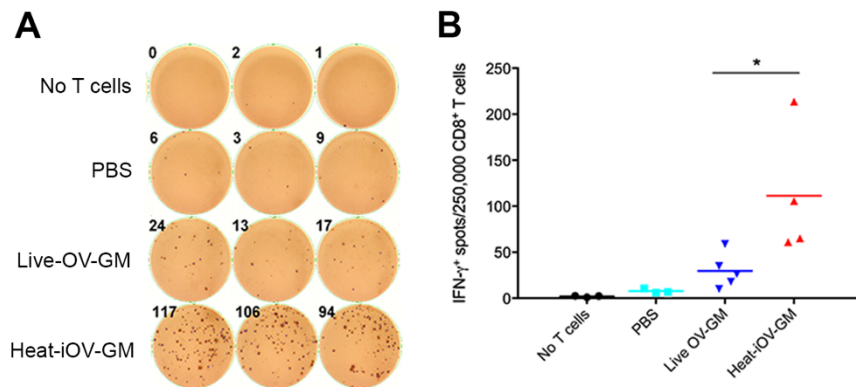

**Figure S2** Higher anti-tumor IFN- $\gamma^+$ CD8 $^+$  T cells in the spleen from mice treated with heat-iOV-GM compared with live OV-GM in MC38 murine colon cancer model. MC38 tumor cells were intradermally implanted into both flanks of C57BL/6J mice. Established tumors were treated with either Live-OV-GM or heat-iOV-GM. PBS was used as a control. IFN- $\gamma^+$ CD8 $^+$  T cells from spleens of MC38 tumor-bearing mice treated with different viruses were analyzed using ELISPOT assay. (A) Representative images from an ELISPOT assay. (B) IFN- $\gamma^+$  spots per 250,000 purified CD8 $^+$  T cells from the spleens of the mice treated with IT PBS, OV, live OV-GM, or heat-iOV-GM (n=5, \* $P < 0.05$ ; \*\* $P < 0.01$ ).

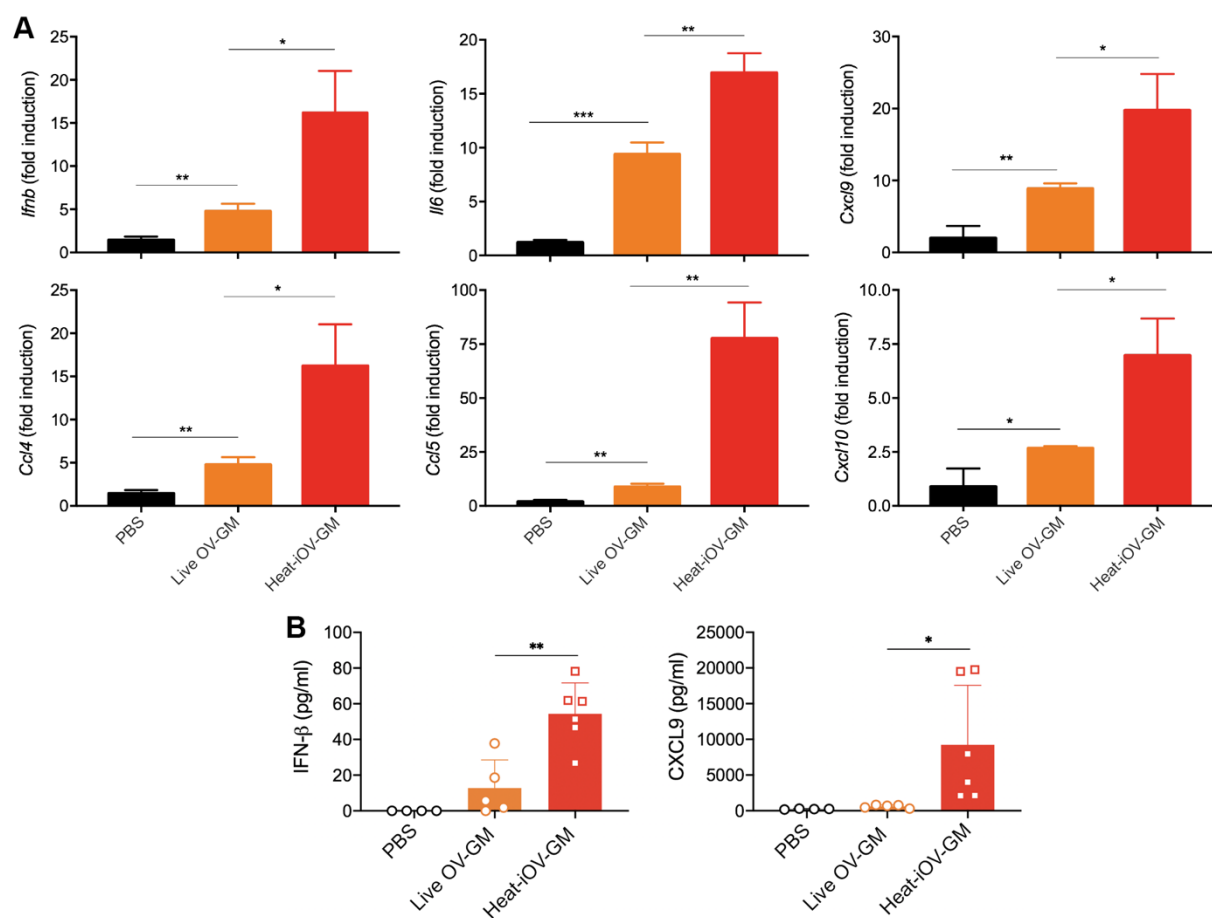

**Figure S3** IT heat-iOV-GM induces higher levels of IFN and proinflammatory cytokines and chemokines in the injected tumors compared with IT live OV-GM. B16-F10 melanoma cells were implanted intradermally on the right flank of C57BL/6J mice. Once tumors reach 3-4 mm in diameter, they were injected with either PBS or live OV-GM ( $2 \times 10^7$  pfu), or with equivalent amounts of heat-iOV-GM. The tumors were harvested one day after injection and mRNAs were extracted. (A) Shown here are quantitative real-time PCR analyses of *Ifnb*, *Ccl4*, *Il6*, *Ccl5*, *Cxcl9*, and *Cxcl10* gene expression in the injected B16-F10 tumors from mice treated with either PBS, live OV-GM, or heat-iOV-GM ( $n=4-5$ ,  $*P < 0.05$ ,  $**P < 0.01$ ,  $***P < 0.001$ ,  $t$  test). (B) Tumors were harvested one day post injection and homogenized by GentleMACS Dissociator in PBS in the presence of proteinase inhibitor. The levels of IFN $\beta$  and CXCL9 were determined by ELISA ( $n=5-6$ ,  $*P < 0.05$ ,  $t$  test).



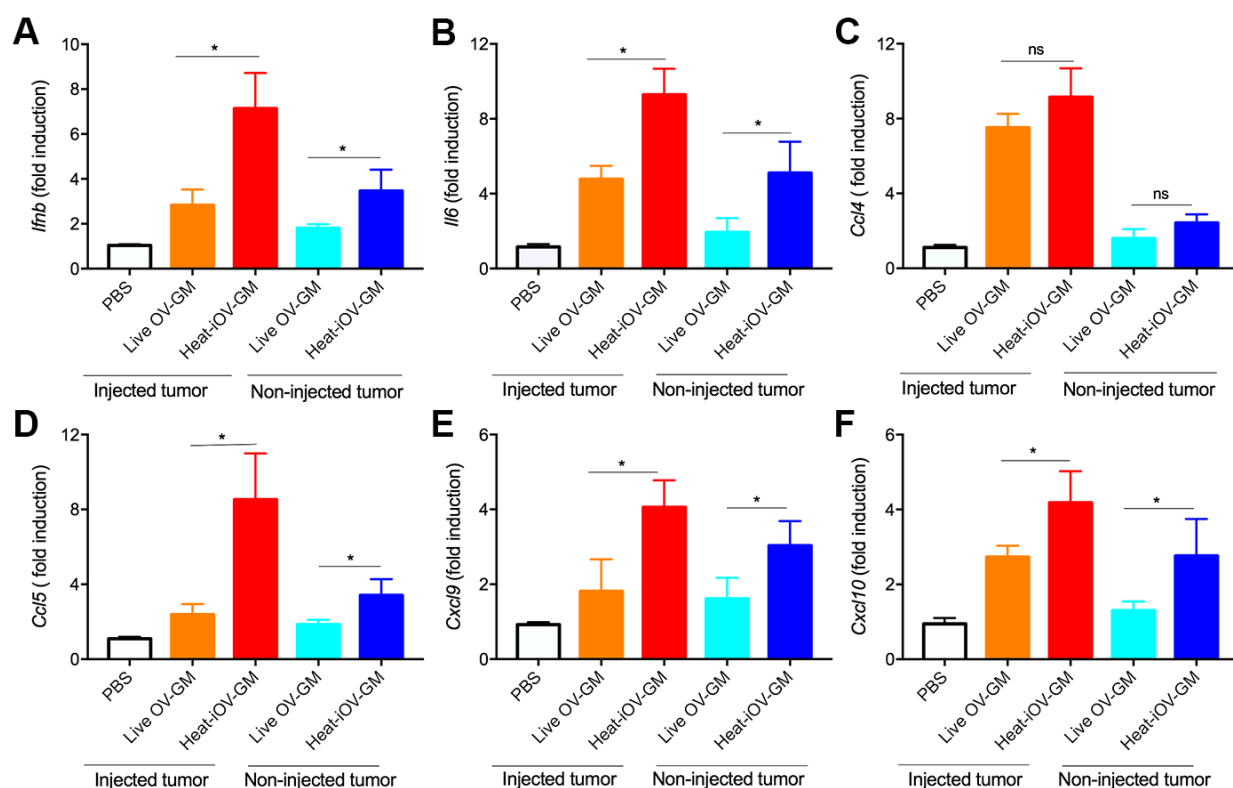

**Figure S4** IT heat-iOV-GM induces higher levels of IFN and proinflammatory cytokines and chemokines in both injected and non-injected tumors in MC38 tumor model. MC38 tumor cells were intradermally implanted into both flanks of C57BL/6J mice. Established tumors on the right flanks were treated with either live-OV-GM or heat-iOV-GM. PBS was used as a control. The right flank tumors were harvested one day after first injection. To investigate the innate immunity of the left flank tumors, mice were treated with IT viruses to the right flank tumors twice three days apart. The left flank tumors were harvested one day after the second injection. (A-F) Shown here are quantitative real-time PCR analyses of *Ifnb* (A), *Il6* (B), *Ccl4* (C), *Ccl5* (D), *Cxcl9* (E), and *Cxcl10* (F) gene expression in the injected MC38 tumors from mice treated with either PBS, live OV-GM, or heat-iOV-GM. (n=4-5, \* $P < 0.05$ , \*\* $P < 0.01$ , \*\*\* $P < 0.001$ ,  $t$  test).

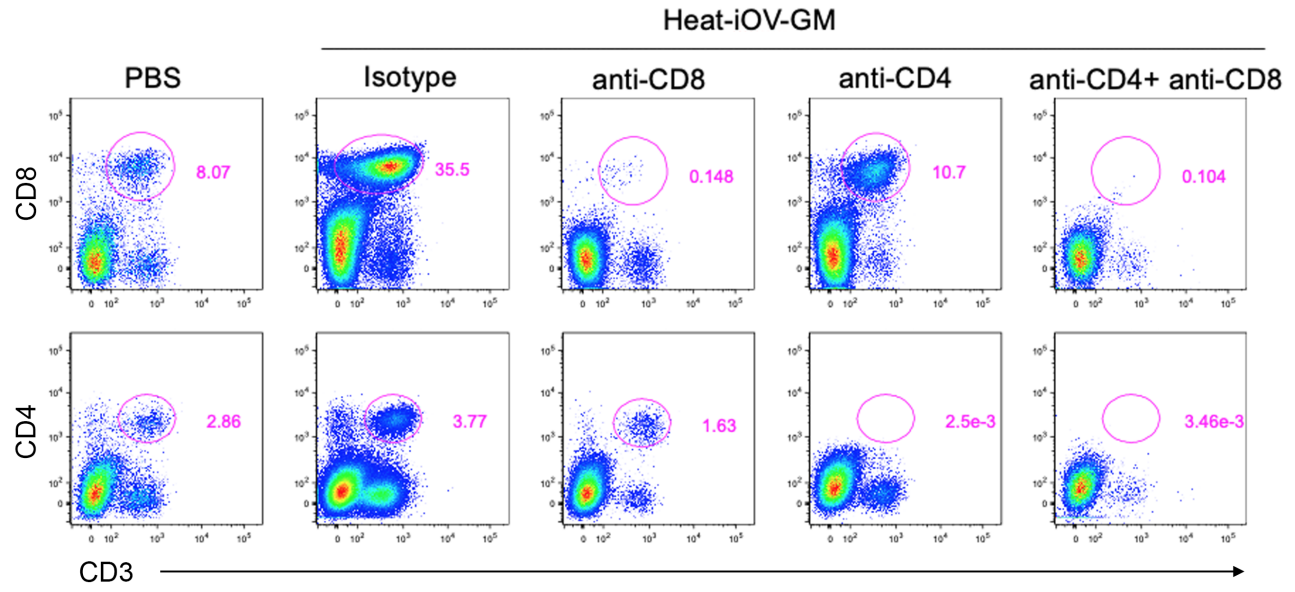

**Figure S5** Verification of CD4<sup>+</sup> and CD8<sup>+</sup> T cell depletion in mice B16-F10 implantation model by flow cytometry. C57BL/6J mice were intradermally implanted with B16-F10 tumors on both the left and right flanks. Established tumors were injected with heat-iOV-GM or PBS control at day 8 and 11 post implantation. Depletion antibody was injected intraperitoneally at day 7, 10, and 12 post implantation. Tumors were harvested at day 13 for TIL analysis. Frequencies of CD4<sup>+</sup>CD3<sup>+</sup> and CD8<sup>+</sup>CD3<sup>+</sup> T cells in tumor samples from each treatment group are shown.
